# Supplementary material for: A developmental evaluation to enhance stakeholder engagement in a wide-scale interactive project disseminating quality improvement data: study protocol for a mixed-methods study
Source: PubMed Central journal article supplement — BMJ Open. 2017 Jul 13;7(7):e016341. doi: 10.1136/bmjopen-2017-016341 (PMC5726089; doi:10.1136/bmjopen-2017-016341), 2017-07-13
Supplement: bmjopen-2017-016341.draft_revisions.pdf [file bmjopen-2017-016341.draft_revisions.pdf]

# BMJ Open

## A developmental evaluation to enhance stakeholder engagement in a wide-scale interactive dissemination project using quality improvement data: study protocol

|                                 |                                                                                                                                                                                                                                                                                                                                                                                                                                                                                                                                                                                                                                                                                 |
|---------------------------------|---------------------------------------------------------------------------------------------------------------------------------------------------------------------------------------------------------------------------------------------------------------------------------------------------------------------------------------------------------------------------------------------------------------------------------------------------------------------------------------------------------------------------------------------------------------------------------------------------------------------------------------------------------------------------------|
| Journal:                        | <i>BMJ Open</i>                                                                                                                                                                                                                                                                                                                                                                                                                                                                                                                                                                                                                                                                 |
| Manuscript ID                   | bmjopen-2017-016341                                                                                                                                                                                                                                                                                                                                                                                                                                                                                                                                                                                                                                                             |
| Article Type:                   | Protocol                                                                                                                                                                                                                                                                                                                                                                                                                                                                                                                                                                                                                                                                        |
| Date Submitted by the Author:   | 09-Feb-2017                                                                                                                                                                                                                                                                                                                                                                                                                                                                                                                                                                                                                                                                     |
| Complete List of Authors:       | Laycock, Alison; Charles Darwin University, Menzies School of Health Research<br>Bailie, Jodie; The University of Sydney, University Centre for Rural Health<br>Matthews, Veronica; Charles Darwin University, Menzies School of Health Research<br>Cunningham, Frances; Charles Darwin University, Menzies School of Health Research<br>Harvey, Gillian; University of Adelaide, Adelaide Nursing School; The University of Manchester, Alliance Manchester Business School<br>Percival, Nikki; University of Technology Sydney, The Australian Centre for Public and Population Health Research<br>Bailie, Ross; The University of Sydney, University Centre for Rural Health |
| <b>Primary Subject Heading</b>: | Health services research                                                                                                                                                                                                                                                                                                                                                                                                                                                                                                                                                                                                                                                        |
| Secondary Subject Heading:      | Public health                                                                                                                                                                                                                                                                                                                                                                                                                                                                                                                                                                                                                                                                   |
| Keywords:                       | developmental evaluation, interactive dissemination, primary health care, indigenous, quality improvement, stakeholder engagement                                                                                                                                                                                                                                                                                                                                                                                                                                                                                                                                               |
|                                 |                                                                                                                                                                                                                                                                                                                                                                                                                                                                                                                                                                                                                                                                                 |

SCHOLARONE™  
Manuscripts

1  
2  
3 **1 A developmental evaluation to enhance stakeholder engagement in**  
4 **2 a wide-scale interactive dissemination project using quality**  
5 **3 improvement data: study protocol**

4 Alison Laycock<sup>1</sup>, Jodie Bailie<sup>2</sup>, Veronica Matthews<sup>1</sup>, Frances Cunningham<sup>1</sup>, Gillian Harvey<sup>3</sup>, Nikki  
5 Percival<sup>4</sup>, Ross Bailie<sup>2</sup>

6 <sup>1</sup>Menzies School of Health Research, Charles Darwin University, Casuarina, NT, Australia

7 <sup>2</sup>University Centre for Rural Health, the University of Sydney, Lismore, NSW, Australia

8 <sup>3</sup>Adelaide Nursing School, The University of Adelaide, Adelaide, SA Australia; Alliance Manchester  
9 Business School, The University of Manchester, Manchester, United Kingdom

10 <sup>4</sup>The Australian Centre for Public and Population Health Research, University of Technology Sydney,  
11 Sydney, NSW, Australia

12  
13 Corresponding author: Alison Laycock, [Alison.laycock@menzies.edu.au](mailto:Alison.laycock@menzies.edu.au)

14 Menzies School of Health Research, Charles Darwin University  
15 PO Box 41096  
16 Casuarina NT 0811  
17 Australia

18 Ph: +61 419 824341

19 Fax: +61 8 8946 8464

20 Alison Laycock, Email: [alison.laycock@menzies.edu.au](mailto:alison.laycock@menzies.edu.au)

21 Jodie Bailie, Email: [jodie.bailie@sydney.edu.au](mailto:jodie.bailie@sydney.edu.au)

22 Veronica Matthews, Email: [veronica.matthews@menzies.edu.au](mailto:veronica.matthews@menzies.edu.au)

23 Frances Cunningham, Email: [frances.cunningham@menzies.edu.au](mailto:frances.cunningham@menzies.edu.au)

24 Gillian Harvey, Email: [Gillian.Harvey@adelaide.edu.au](mailto:Gillian.Harvey@adelaide.edu.au)

25 Nikki Percival, Email: [Nikki.percival@uts.edu.au](mailto:Nikki.percival@uts.edu.au)

26 Ross Bailie, Email: [ross.bailie@sydney.edu.au](mailto:ross.bailie@sydney.edu.au)

27  
28 **Word count:** 3846

29 **Key words** – developmental evaluation, interactive dissemination, stakeholder engagement, primary  
30 health care, indigenous, quality improvement

1  
2  
3 31 **ABSTRACT**  
4  
5

6 32 **INTRODUCTION:**  
7  
8

9 33 Bringing together continuous quality improvement (CQI) data from multiple health services offers  
10 34 opportunities to identify common improvement priorities, and to develop interventions at various  
11 35 system levels to achieve large-scale improvement in care. An important principle of CQI is  
12 36 practitioner participation in interpreting data and planning evidence-based change. This study will  
13 37 contribute knowledge about engaging diverse stakeholders in collaborative and theoretically-  
14 38 informed processes to identify and address priority evidence-practice gaps in care delivery. This  
15 39 paper describes a developmental evaluation to support and refine a novel interactive dissemination  
16 40 strategy using aggregated CQI data from Aboriginal and Torres Strait Islander primary healthcare  
17 41 centres in Australia. The strategy aims to effect multi-level system improvement in Aboriginal and  
18 42 Torres Strait Islander primary healthcare.  
19  
20  
21  
22  
23  
24  
25  
26  
27  
28  
29  
30

31 43 **METHODS AND ANALYSIS:** Data will be gathered using document analysis, online surveys, interviews  
32 44 with participants, and iterative analytical processes with the research team. These methods will  
33 45 enable real-time feedback to guide refinements to the design, reports, tools and processes as the  
34 46 interactive dissemination strategy is implemented. Qualitative data from interviews and surveys will  
35 47 be analysed and interpreted to provide in-depth understanding of factors that influence engagement  
36 48 and stakeholder perspectives about use of the aggregated data and generated improvement  
37 49 strategies. Sources of data will be triangulated to build up a comprehensive, contextualised  
38 50 perspective and integrated understanding of the strategy development, implementation and  
39 51 findings.  
40  
41  
42  
43  
44  
45  
46  
47  
48  
49  
50  
51

52 52 **ETHICS AND DISSEMINATION:**  
53  
54

55 53 The Human Research Ethics Committee (HREC) of the Northern Territory Department of Health and  
56 54 Menzies School of Health Research (Project 2015-2329), the Central Australian HREC (Project 15-  
57  
58  
59  
60

1  
2  
3 55 288), and the Charles Darwin University HREC (Project H15030) approved the study. Dissemination  
4 56 will include articles in peer-reviewed journals, policy and research briefs. Results will be presented at  
5 57 conferences and quality improvement network meetings. Researchers, clinicians, policy-makers and  
6 58 managers developing evidence-based system and policy interventions should benefit from this  
7  
8  
9 59 research.  
10  
11  
12 60

## 61 **STRENGTHS AND LIMITATIONS OF THIS STUDY**

- 62 • Each iteration of the dissemination strategy provides an opportunity to evaluate and refine  
63 the design, processes and reports in response to researcher, participant and data collection  
64 needs.
- 65 • Use of mixed methods and inclusion of perspectives of the research team and diverse  
66 healthcare stakeholders enhances validity and provides comprehensive data.
- 67 • The dissemination strategy encourages stakeholders to send reports and surveys to others,  
68 limiting ability to measure the reach or response rates of the dissemination strategy.
- 69 • The evaluator is a team member and evaluates the research team's work. Potential lack of  
70 objectivity is offset by continuing opportunities for reflexivity, sense-making and timely  
71 adaptations within the project.

## 73 **INTRODUCTION**

### 74 **Background**

75 Improving the implementation of evidence-based healthcare is a complex enterprise. It involves the  
76 production, translation and use of knowledge by researchers, policy-makers, service providers and  
77 consumers. Using evidence to improve the quality of primary health care (PHC) services for

1  
2  
3 78 Aboriginal and Torres Strait Islander people (Australia's Indigenous nations) is critically important in  
4  
5 79 Australia, where Indigenous people experience an unacceptable burden of ill health, shorter life  
6  
7 80 expectancy and poorer access to PHC services compared with the general population.[1, 2]  
8  
9  
10 81 A number of health centre teams that serve Indigenous communities use continuous quality  
11  
12 82 improvement (CQI) tools and processes to make evidence-based improvements in the care they  
13  
14 83 deliver. CQI is inherently participatory; it generates and uses data and iterative processes to plan  
15  
16 84 interventions, typically at the team or health centre level. It applies strategies that are known to be  
17  
18 85 effective in knowledge translation, such as audit and feedback and goal setting.[3-5]  
19  
20  
21 86 Improvement interventions have a higher probability of success when system changes are  
22  
23 87 implemented concurrently at several levels – individual care processes, group or team work, the  
24  
25 88 organization, and the larger system and policy environment.[6, 7] Despite developments in CQI  
26  
27 89 theory and practice, there is a gap in the literature about how to engage stakeholders in wide-scale  
28  
29 90 CQI processes to address improvement barriers and inform the development of system  
30  
31 91 strengthening strategies. There is also a need for knowledge about how different knowledge  
32  
33 92 translation strategies influence outcomes.[8]  
34  
35  
36  
37 93 Bringing together CQI data from multiple PHC centres provides scope to use CQI in a different way. It  
38  
39 94 offers opportunities to engage diverse stakeholders in identifying common priorities for improving  
40  
41 95 care and interventions that target change at various levels of the health system. This paper describes  
42  
43 96 the study protocol for the use of developmental evaluation (DE) to evaluate and strengthen a novel  
44  
45 97 theory-informed wide-scale interactive dissemination strategy engaging diverse stakeholders  
46  
47 98 involved in Australian Indigenous healthcare. This strategy uses aggregated CQI data from 175 PHC  
48  
49 99 centres serving Indigenous people, for the purpose of informing improvement interventions at  
50  
51 100 different levels of the health system.  
52  
53  
54

55  
56 **101 The study context - Australian Indigenous primary health care and quality improvement**  
57  
58  
59  
60

1  
2  
3 102 Despite universal coverage for healthcare services through Medicare and specific funding for  
4  
5 103 Indigenous PHC services, there is a significant and persistent disparity between the health and life  
6  
7 104 expectancy of Indigenous and non-Indigenous Australians.[2, 9] The disparity is well documented. It  
8  
9 105 relates to a history of colonisation and disempowerment, ongoing racial, social, educational and  
10  
11 106 economic inequalities and lack of access to culturally safe service provision.[1, 10] Indigenous people  
12  
13 107 access PHC through Indigenous community-controlled health services and government-operated  
14  
15 108 PHC centres specifically established to meet the needs of Aboriginal and Torres Strait Islander  
16  
17 109 people, and through private general practices. PHC delivery settings are geographically diverse and  
18  
19 110 vary in population density, governance arrangements and resource provision.  
20  
21  
22  
23 111 Reducing healthcare disparities requires CQI and system strengthening approaches that address the  
24  
25 112 complexities of the PHC delivery environment and draw on data about clinical care and utilisation of  
26  
27 113 services.[7, 11] In Indigenous PHC, this calls for approaches that incorporate the needs and values of  
28  
29 114 Indigenous communities,[12] make optimal use of health service performance data and utilise the  
30  
31 115 professional and contextual knowledge of those working in the sector.[5, 13] It involves policy  
32  
33 116 change and improvement interventions at various system levels.[6, 14]

### 37 117 **Developmental evaluation**

38  
39  
40 118 Developmental evaluation (DE) is gaining recognition as a useful approach for implementation  
41  
42 119 research.[15, 16] Evolving from utilisation-focused evaluation[17] and drawing on tools and methods  
43  
44 120 from a variety of disciplines, DE can be used to address complex health system issues that require  
45  
46 121 engagement of multiple stakeholders in both the research and change processes.[18]  
47  
48  
49 122 DE is typically embedded in the project context and involves continuous feedback to inform  
50  
51 123 innovators, often with the evaluator positioned within a project or program team. It is well suited to  
52  
53 124 adapting projects or interventions implemented under complex conditions, or emergent situations in  
54  
55 125 which multiple influences make it difficult to predict what will happen as a project or strategy  
56  
57  
58  
59  
60

1  
2  
3 126 progresses.[19, 20] DE has been used, for example, to support change through team dialogue, to  
4  
5 127 innovate health and recreation programs in Indigenous communities, to develop principles and  
6  
7 128 collaborative processes between agencies working to address difficult social and economic issues,  
8  
9 129 and to engage communities of practice in complex systems change.[21] Challenges in DE include  
10  
11 130 managing uncertainty and ambiguity, the volume of data and maintaining a results focus.[22]  
12  
13

### 14 131 **Aims of the developmental evaluation (DE) study**

15  
16  
17 132 The aim of the DE study is to evaluate and enhance a novel interactive dissemination strategy  
18  
19 133 designed to engage PHC stakeholders in Indigenous PHC in wide-scale processes to interpret and use  
20  
21 134 aggregated CQI data.  
22  
23

24  
25 135 The objectives of the study are to:

- 26  
27  
28 136 • Develop and refine the design, reports, processes and resources used in the interactive  
29  
30 137 dissemination strategy  
31  
32 138 • Explore the barriers and facilitators to stakeholder engagement in the interactive  
33  
34 139 dissemination strategy  
35  
36 140 • Identify the actual or intended use of the aggregated CQI data and co-produced knowledge  
37  
38 141 by different stakeholders, and factors influencing use  
39  
40 142 • Examine and assess whether the interactive dissemination strategy (known as the ESP  
41  
42 143 project) has achieved its aims.  
43  
44  
45

### 46 144 **The 'Engaging Stakeholders in Identifying Priority Evidence-Practice Gaps and Strategies for** 47 48 145 **Improvement in Primary Health Care (ESP)' project – an opportunity for learning and innovation** 49 50 146 **through DE**

51  
52  
53 147 Described in a separate paper, the interactive dissemination project, titled 'Engaging Stakeholders in  
54  
55 148 Identifying Priority Evidence-Practice Gaps and Strategies for Improvement in Primary Health Care  
56  
57 149 (ESP)',[23] aims to engage stakeholders with aggregated data and promote wide-scale  
58  
59  
60

1  
2  
3 150 improvements in quality of care by applying a system-wide approach to CQI.[24] The ESP project  
4  
5 151 utilises a comprehensive CQI dataset collected for the Audit and Best Practice for Chronic Disease  
6  
7 152 (ABCD) National Research Partnership (2010 – 2014).[4, 25]  
8  
9  
10 153 Over more than a decade, PHC centres participating in the Partnership used evidence-based best-  
11  
12 154 practice clinical record audit and system assessment tools to assess and reflect on system  
13  
14 155 performance, interpreting the data to identify improvement priorities and develop strategies  
15  
16 156 appropriate to their service population and delivery context.[5] Available ABCD CQI tools cover  
17  
18 157 various aspects of PHC (e.g., chronic illness, preventive, child and maternal care).  
19  
20  
21  
22 158 In addition to their routine use of these CQI tools as part of their Plan-Do-Study-Act CQI processes,  
23  
24 159 175 PHC centres involved in the Partnership voluntarily provided service-level de-identified CQI data  
25  
26 160 for analysis. These audit data, based on almost 60,000 audits of patient records and 492 systems  
27  
28 161 assessments, provide a unique opportunity to utilise aggregated health centre performance data for  
29  
30 162 wide-scale system improvement and population health benefit, and to explore innovative ways to  
31  
32 163 engage healthcare stakeholders with evidence.  
33  
34  
35 164 Aiming to support understanding and use of these data through an interactive exchange between  
36  
37 165 healthcare researchers and stakeholders, the ESP project draws on explicit and practical knowledge,  
38  
39 166 and different types of expertise, to identify improvement strategies aligned with implementation  
40  
41 167 settings.[23, 26, 27]  
42  
43  
44  
45 168 The ESP project design is adapted from systematic methods that aim to link interventions to  
46  
47 169 modifiable barriers to address evidence-practice gaps.[28] Four phases of online report distribution  
48  
49 170 and feedback will involve stakeholders in data interpretation and knowledge-co-production, as  
50  
51 171 follows:  
52  
53  
54 172 1. *Phase One: identification of priority evidence-practice gaps.* Stakeholders receive a report of  
55  
56 173 aggregated cross-sectional CQI data and complete an online survey.  
57  
58  
59  
60



- 1  
2  
3 174 2. *Phase Two: Identification of barriers and enablers to addressing gaps in care identified in*  
4  
5 175 *Phase 1.* Stakeholders receive a report of trend data relevant to the identified priority  
6  
7 176 evidence-practice gaps. They complete an online survey about influences on individual  
8  
9 177 behaviours, health centre and wider systems. The survey questions are based on the  
10  
11 178 theoretical domains framework[29, 30] and on other models identifying barriers to the  
12  
13 179 effective functioning of health centre and higher level systems.[31-33]  
14  
15  
16 180 3. *Phase 3: Identification of strategies for improvement.* Provided with findings from phases 1  
17  
18 181 and 2, and an evidence summary about CQI implementation, stakeholders are asked to  
19  
20 182 suggest strategies likely to be effective in addressing modifiable barriers and strengthening  
21  
22 183 enablers.  
23  
24 184 4. In the final phase, respondents are asked to review the draft final report and provide  
25  
26 185 feedback on the overall findings in the specific clinical care area.  
27  
28

29  
30 186 Separate processes will be implemented using audit data collected for child health, chronic illness  
31  
32 187 care, preventive, maternal, mental health and rheumatic heart disease care. The rationale for the  
33  
34 188 ESP project is that involving diverse stakeholders in a phased approach of using aggregated CQI data  
35  
36 189 should stimulate discussion and information sharing, and enhance ownership of the development of  
37  
38 190 interventions to address system gaps. The collaboratively produced findings are intended as a  
39  
40 191 resource for planning implementation interventions that fit materially, historically and culturally  
41  
42 192 with organisational and local contexts.[34]  
43  
44

## 193 **METHODS AND ANALYSIS**

45  
46  
47  
48

49 194 Using a case study approach[35, 36] the DE will examine and enhance the methods through which  
50  
51 195 the dissemination of aggregated health centre performance data and knowledge co-production are  
52  
53 196 enacted in the ESP project. It seeks to effect changes and develop understanding as the  
54  
55  
56  
57  
58  
59  
60

1  
2  
3 197 dissemination project and concurrent evaluation proceed through iterative phases of  
4  
5 198 implementation.

6  
7  
8 199 **Systematically applying developmental evaluation within the ESP project**

9  
10  
11 200 The DE is designed to align with the aim and design of the ESP project, which will provide  
12  
13 201 opportunities to collect feedback from survey respondents, to identify interview participants and to  
14  
15 202 engage the research team in DE processes.

16  
17  
18 203 Figure 1 illustrates how DE is systematically applied within the ESP project.

19  
20  
21 204 ***[INSERT FIGURE 1]***

22  
23  
24 205 DE processes: The evaluator (AL) is embedded within the research team in order to support the  
25  
26 206 reflective and iterative nature and the co-creation principle of DE,[21] and to facilitate real-time  
27  
28 207 responses to project conditions and issues as they emerge. The team will discuss and interpret  
29  
30 208 stakeholder feedback, and use reflective critical thinking to identify and clarify issues relevant to  
31  
32 209 implementing the ESP project. Through these processes, decision making for ongoing project  
33  
34 210 implementation will be shared amongst team members and informed by data. Insights will be  
35  
36 211 developed about stakeholder and team needs and capacity to engage in the collaborative processes  
37  
38 212 of the strategy.

39  
40  
41  
42 213 Iterative cycles: These processes will be applied to iterative cycles of reflection through which  
43  
44 214 actions will be agreed, refinements tested, results observed and feedback gathered. The systematic  
45  
46 215 approach will assist in managing the high volume of data and maintaining focus. It will lead to  
47  
48 216 increased understanding of what works well or poorly to illicit findings and engage project  
49  
50 217 participants and the research team in collaborative processes. Strategy design, processes, tools and  
51  
52 218 reports are expected to be continuously modified to support the presentation of data to inform wide  
53  
54 219 scale improvement. Team knowledge and skills in relation to implementing interactive dissemination  
55  
56 220 in the context of Indigenous healthcare will be strengthened through the continuous cycle of  
57  
58  
59  
60

1  
2  
3 221 learning and development, as the phases of the dissemination strategy are repeated using sets of  
4  
5 222 aggregated CQI data in different areas of clinical care.  
6  
7

8 223 Implementation context: The DE study is being conducted within the wider context for CQI research  
9  
10 224 in Australian Indigenous PHC, where CQI is used within many health centres. There is a positive  
11  
12 225 policy environment for CQI and a history of researcher-service provider partnerships for CQI  
13  
14 226 development.  
15  
16

### 17 227 **Data collection and analysis methods**

18  
19  
20 228 The sources of data used in this DE study include documentation, quantitative and qualitative  
21  
22 229 surveys and participant interviews. A further source of evidence is participant-observation[36] - the  
23  
24 230 actions taken by the research team following their review of evidence and experiences during  
25  
26 231 project implementation. These are appropriate sources for research in which theory is nascent and  
27  
28 232 research questions are exploratory.[37]  
29  
30  
31

#### 32 233 **1. Document analysis**

33  
34  
35 234 Administrative project records will provide a source of information about the context, scope, early  
36  
37 235 stages of ESP project development, distribution of reports and ongoing implementation. Data  
38  
39 236 sources will include meeting minutes and recorded interactions between research team members,  
40  
41 237 and between team members and other stakeholders. These documents will be used to identify and  
42  
43 238 clarify key issues, dates, events and tasks, and to track key decisions and developments in the  
44  
45 239 design, processes, reports and other resources.  
46  
47

#### 48 240 **2. Survey data**

49  
50  
51  
52 241 Online surveys designed to collect data leading to the generation of wide-scale CQI strategies (as  
53  
54 242 part of the ESP project) incorporate evaluative questions. The questions will ask respondents to rate,  
55  
56 243 on a Likert scale, the accessibility, content, usefulness and useability of information in the reports,  
57  
58  
59  
60

1  
2  
3 244 and the extent to which the reports promote workplace discussion about care quality. These data  
4  
5 245 will be analysed using simple descriptive statistics. Respondents will also be invited to provide free  
6  
7 246 text responses suggesting ways in which the team can improve the surveys and reports, and support  
8  
9 247 data interpretation. Free text responses will be integrated and analysed with other qualitative data.  
10  
11 248 (Explicit survey items are at Supplementary files 1 - 4).

12  
13  
14 249 As key change decisions are made, the research team will modify the surveys to seek feedback about  
15  
16 250 the ESP project modifications. For example, additional questions seeking comments about newly  
17  
18 251 developed resources, design innovations or changed report formats will be included.

19  
20  
21 252 Records of online survey data, (collected as part of the interactive dissemination project), will  
22  
23 253 provide important evaluation data about who is engaging with project processes across Australian  
24  
25 254 jurisdictions. It will enable the team and evaluator to track stakeholder engagement through each  
26  
27 255 phase and cycle for each clinical care area, including the number of responses to each survey,  
28  
29 256 whether responses submitted are from individuals or groups and how this impacts on responses.  
30  
31 257 Respondent information requested in the surveys includes professional role, scope and location  
32  
33 258 (national, Australian jurisdiction), work setting or population group served (e.g. urban, rural, remote  
34  
35 259 populations), type of organisation represented (e.g., community controlled health centre,  
36  
37 260 government health service) and group size (as relevant). This information will enable the purposive  
38  
39 261 sampling of interviewees.  
40  
41  
42  
43

### 44 262 **3. *Semi-structured interviews***

45  
46  
47 263 Semi-structured interviews will be conducted to provide detailed information and feedback for the  
48  
49 264 DE. They will be used to explore themes that emerge in the survey data and to probe factors and  
50  
51 265 perspectives relating to participant engagement, use of aggregated data and findings, and how to  
52  
53 266 improve the project processes and presentation of information.  
54  
55  
56  
57  
58  
59  
60

1  
2  
3 267 A single Australian jurisdiction will be the focus of qualitative interviews, purposively selected  
4  
5 268 because of its long history of CQI and CQI research in Indigenous PHC. Participating health centres  
6  
7 269 have contributed a significant proportion of the aggregated CQI data used in the ESP project. Further  
8  
9 270 interviews will also be conducted with participants who have cross jurisdiction (national) roles.  
10  
11 271 Potential interviewees will be identified from respondent information collected through the surveys  
12  
13 272 - contact details are provided voluntarily by online survey respondents. Interview participants will be  
14  
15 273 purposively sampled from project participants to represent different professional roles, organisation  
16  
17 274 types and work settings, and participation in different ESP project cycles.  
18  
19  
20  
21 275 Twenty-five to 30 interviews are expected to provide representative data for effective comparison  
22  
23 276 between groups and settings. The aim will be to conduct sufficient interviews to build a convincing  
24  
25 277 analytical narrative based on richness and detail and to achieve 'information power' in identifying  
26  
27 278 themes in the data.[38] The evaluator (AL) will conduct all interviews.  
28  
29  
30 279 Interview transcripts will be de-identified and entered into NVivo, a computer assisted qualitative  
31  
32 280 data analysis program to assist with coding for analysis. The evaluator will generate a priori codes  
33  
34 281 derived from the literature and based on a widely used conceptual framework for knowledge  
35  
36 282 translation[39] and the DE research questions, ahead of identifying emergent codes to discover  
37  
38 283 themes, categories and patterns in the data, to explore the relationships between them and to build  
39  
40 284 theories through an inductive process.[40] Coding will be checked by a research colleague to ensure  
41  
42 285 coding reliability and consistency.  
43  
44  
45  
46 286 The aim of the analysis of interview data is to provide information for two purposes. Firstly, the  
47  
48 287 preliminary results will be reported and discussed with research team members to help inform the  
49  
50 288 developmental evaluation process. Together with other information, such as survey findings, the  
51  
52 289 interview data will influence real-time changes to ESP project processes, tools and reports as the  
53  
54 290 interactive dissemination project is implemented.  
55  
56  
57  
58  
59  
60

291 The second purpose is for interpretation and reflection to gain deep insight and develop  
 292 understanding relevant to the DE research questions. This includes understanding of the factors  
 293 influencing stakeholder engagement in the interactive dissemination project, ways to support  
 294 participation, and the extent to which being involved influences participants' implementation  
 295 decisions. It includes insights into use of the CQI data and use of project findings about consensus  
 296 priority evidence-practice gaps, barriers, enablers and strategies for improving care quality.

#### 297 **4. Reflective processes with the research team**

298 As illustrated in Figure 1, the research team's learning and actions will be guided by a facilitated  
 299 process of reflection and analysis, drawing on stakeholder feedback and the team's experiences.  
 300 This processes will enable the team to identify emerging issues and to innovate, test and refine the  
 301 elements of the interactive dissemination strategy. It will be based on the questions: What? (What  
 302 happened?) So what? (What do the results mean or imply? How did we influence the results?)  
 303 Now what? (How do we respond? What should we do differently?).[41] An example of how these  
 304 questions are applied is shown in Table 1.

305 **[INSERT TABLE 1]**

306 *Table 1: Reflective evaluation questions*

| What<br>(What happened?)                                                                                             | So what?<br>(What does it mean?)                                                                                                                                                                                    | Now what?<br>(What to do differently?)                                                                                                                                              |
|----------------------------------------------------------------------------------------------------------------------|---------------------------------------------------------------------------------------------------------------------------------------------------------------------------------------------------------------------|-------------------------------------------------------------------------------------------------------------------------------------------------------------------------------------|
| How many survey responses did we receive?<br><br>Whose responses did we capture?<br><br>What was the quality of data | Do we need to promote and/or distribute reports in other ways - and target particular people?<br><br>Do we need to clarify, adjust, add or delete survey questions to illicit robust data and encourage engagement? | Based on the explicit and experiential evidence, should we be making further changes to enhance the:<br><br>- quality of data collected<br>- processes<br>- presentation of reports |
|                                                                                                                      |                                                                                                                                                                                                                     | What is the supporting                                                                                                                                                              |

|                                                                                                                                                                                                                                                                                                                                                                                                                                                                    |                                                                                                                                                                                                                                                                                                                                                                                                                                                                                                                                           |                                                                                                                                                                                                                                                                                                                                                                                                 |
|--------------------------------------------------------------------------------------------------------------------------------------------------------------------------------------------------------------------------------------------------------------------------------------------------------------------------------------------------------------------------------------------------------------------------------------------------------------------|-------------------------------------------------------------------------------------------------------------------------------------------------------------------------------------------------------------------------------------------------------------------------------------------------------------------------------------------------------------------------------------------------------------------------------------------------------------------------------------------------------------------------------------------|-------------------------------------------------------------------------------------------------------------------------------------------------------------------------------------------------------------------------------------------------------------------------------------------------------------------------------------------------------------------------------------------------|
| <p>collected through this survey?</p> <p>What feedback did survey respondents and interviewees provide about:</p> <ul style="list-style-type: none"> <li>- the relevance, format and use of the report/ information?</li> <li>- the survey?</li> <li>- supporting resources?</li> </ul> <p>What were team members' experiences of recent implementation processes?</p> <p>What worked well/not so well for you in terms of refinements and modifications made?</p> | <p>Do we consider modifying the next phase, or the ESP process we use for the next dataset?</p> <p>Do we need to present or explain the data differently to enhance understanding?</p> <p>Do we need to modify report formats and content to make them more accessible to those targeted?</p> <p>Does the literature about presenting research to different user groups match respondent feedback?</p> <p>How does feedback and observation connect with what we know from our experience of engaging healthcare stakeholders in CQI?</p> | <p>evidence for a particular direction or modification?</p> <p>How should we prioritise these changes (e.g. considering resources needed, time involved, alignment with theory)?</p> <p>What is the plan of action for making changes?</p> <p>How will these changes impact on the project and others involved (e.g. clinical leaders and report co-authors involved in ESP data analysis)?</p> |
|--------------------------------------------------------------------------------------------------------------------------------------------------------------------------------------------------------------------------------------------------------------------------------------------------------------------------------------------------------------------------------------------------------------------------------------------------------------------|-------------------------------------------------------------------------------------------------------------------------------------------------------------------------------------------------------------------------------------------------------------------------------------------------------------------------------------------------------------------------------------------------------------------------------------------------------------------------------------------------------------------------------------------|-------------------------------------------------------------------------------------------------------------------------------------------------------------------------------------------------------------------------------------------------------------------------------------------------------------------------------------------------------------------------------------------------|

307

308

309 The process used with and by the team will thereby reflect a quality improvement process (plan-do-  
 310 study-act cycle). Repeating these processes or cycles in different areas of PHC will offer  
 311 opportunities to continuously gather data, to learn from each cycle of stakeholder engagement and  
 312 feedback and to apply learning to improve the implementation of subsequent activities within the  
 313 interactive dissemination study project (Figure 1). Documenting the processes, team perceptions

1  
2  
3 314 and change decisions will enable consideration of the contribution of DE in strengthening  
4  
5 315 implementation of the ESP project.  
6  
7

8 316 ***Integration of data collection and analysis***  
9

10 317 Analysis of each data collection source needs to be understood on its own terms. However, a  
11  
12 318 triangulated approach to data collection and analysis can build on the strengths of any single  
13  
14 319 approach to answer the research question and achieve useful outcomes[40, 42] and support  
15  
16 320 validation and cross-checking of findings. Taking a pragmatic approach, multiple sources of data will  
17  
18 321 be collected, analysed and integrated[43] to support interpretation and understanding of the needs  
19  
20 322 and perceptions of stakeholder groups that are key to: wide-scale improvement of PHC quality; their  
21  
22 323 capacity to engage with the data; capacity to contribute to the CQI 'conversation' and knowledge  
23  
24 324 sharing processes, and; intentions in relation to use of aggregated data and uptake of project  
25  
26 325 findings.  
27  
28  
29

30  
31 326 In the initial stage of the study, ESP project survey responses will help to inform the development of  
32  
33 327 the exploratory questions used in the semi-structured interviews for the DE. Survey responses will  
34  
35 328 assist in informing the evaluation processes through the dissemination cycles for reporting each area  
36  
37 329 of clinical care. Thereafter, the collection of qualitative and quantitative data will occur concurrently.  
38  
39 330 Semi-structured interviews will be timed to capture the input of participants as they engage with  
40  
41 331 various ESP datasets and surveys, and the ESP project findings (e.g., for maternal health, mental  
42  
43 332 health). Reflective team processes and analysis of project documents for the purpose of informing  
44  
45 333 change decisions will be ongoing.  
46  
47  
48

49 334 The continuous data collection, analysis and synthesis processes using different data sources will  
50  
51 335 provide the team with opportunities to apply what is learned, generate new avenues of enquiry and  
52  
53 336 ideas, and test changes made within the ESP project. Bringing together and interpreting the different  
54  
55 337 types of data will help build a comprehensive picture of ESP project development and a  
56  
57  
58  
59  
60



338 contextualised and integrated understanding of the findings and evaluation outcomes of the ESP  
 339 project.

340 Overall, these data collection and analysis processes are expected to identify key issues and  
 341 principles to inform future interactive dissemination efforts and wide-scale CQI in the context of  
 342 Indigenous PHC, and to contribute knowledge that can be transferred to other healthcare contexts  
 343 and disciplines.

344 Table 2 outlines how the different data sources will be analysed, integrated and used to address the  
 345 DE objectives.

346 **[INSERT TABLE 2]**

347 *Table 2: Data sources and their use to address the developmental evaluation objectives*

| DE objective                                                                                                   | Data source                                                                                                                                                                                           | Analysis and use of data to address DE objective                                              |
|----------------------------------------------------------------------------------------------------------------|-------------------------------------------------------------------------------------------------------------------------------------------------------------------------------------------------------|-----------------------------------------------------------------------------------------------|
| Develop and refine the design, reports, processes and resources used in the interactive dissemination strategy | Document analysis                                                                                                                                                                                     | Identification of implementation strengths, issues and need for refinements                   |
|                                                                                                                | Survey data                                                                                                                                                                                           | Tracking of actions, issues, decisions, key events, changes                                   |
|                                                                                                                | Semi-structured interviews                                                                                                                                                                            | Analysis of quantitative and qualitative feedback about reports, processes, resources, design |
|                                                                                                                | Reflective processes and discussion amongst research team members to integrate, interpret and use different types of data to determine ESP refinement needs and make ongoing implementation decisions | Identification of emerging data patterns, commonalities and ideas for project improvement     |

|                                                             |                                                                                                                                             |                                                                                              |                                                                                                                                                                                 |
|-------------------------------------------------------------|---------------------------------------------------------------------------------------------------------------------------------------------|----------------------------------------------------------------------------------------------|---------------------------------------------------------------------------------------------------------------------------------------------------------------------------------|
| 1<br>2<br>3<br>4<br>5<br>6<br>7<br>8<br>9<br>10<br>11<br>12 | Explore the barriers and facilitators to stakeholder engagement in the interactive dissemination strategy                                   | Semi-structured interviews<br><br>Qualitative survey data                                    | Coding and analysis of data to develop assertions, propositions, generalisations about factors influencing stakeholder engagement. Interpretation to develop understanding      |
| 13<br>14<br>15                                              |                                                                                                                                             | Preliminary findings contribute to team discussions about ESP refinement and implementation. |                                                                                                                                                                                 |
| 16<br>17<br>18<br>19<br>20<br>21<br>22<br>23<br>24<br>25    | Identify actual or intended use of the aggregated CQI data and co-produced knowledge by different stakeholders, and factors influencing use | Semi-structured interviews                                                                   | Coding and analysis of data to develop assertions, propositions, generalisations about stakeholder use of aggregated CQI data and ESP findings. Interpretation to gain insights |
| 26<br>27<br>28<br>29<br>30<br>31                            | Examine and assess whether the interactive dissemination strategy (the ESP project) has achieved its aims                                   | All                                                                                          | Synthesis of all data types and findings to identify key DE findings and outcomes                                                                                               |

348

349 **ETHICS AND DISSEMINATION**350 **Ethics**

351 The study has been approved by the Human Research Ethics Committee of the Northern Territory  
 352 Department of Health and Menzies School of Health Research (Project No. 2015-2329), the Central  
 353 Australian Human Research Ethics Committee (Project No. 15-288), and the Charles Darwin  
 354 University Human Research Ethics Committee (Project No. H15030) from March 2015 to 31 May  
 355 2017.

356 **Dissemination**

1  
2  
3 357 Dissemination will be done by submitting articles to peer-reviewed journals, by thesis and other  
4  
5 358 publications such as research briefs. Results will be presented at relevant conferences and other  
6  
7 359 forums including quality improvement research network meetings.  
8  
9

## 10 360 **DISCUSSION**

11  
12  
13  
14 361 The study seeks to support, develop and evaluate an interactive dissemination strategy (the ESP  
15  
16 362 project), involving stakeholders in Indigenous PHC in the novel use of aggregated CQI data to identify  
17  
18 363 priority evidence -practice gaps, barriers, enablers, and strategies in different areas of clinical care.  
19  
20 364 The characteristics of DE, particularly its capacity to support emergence and adaptation in complex  
21  
22 365 settings, make it suitable for this purpose. The collection and analysis of DE data through iterative  
23  
24 366 cycles of stakeholder feedback and team reflection will provide information and opportunities for  
25  
26 367 the continual refinement of research report presentation, and the adjustment of tools and processes  
27  
28 368 for capturing participant knowledge. The analysis and interpretation of interview data will provide  
29  
30 369 insights about ways to engage stakeholders in wide-scale CQI, and build greater understanding of  
31  
32 370 the implementation context, use of data and ESP project findings, and implications for system  
33  
34 371 improvement.  
35  
36  
37  
38 372 Recent knowledge translation literature indicates gaps in knowledge about how different knowledge  
39  
40 373 translation strategies influence outcomes, and about the relationship between their underlying logic  
41  
42 374 or theory and beneficial outcomes.[8, 44] There is also need for detailed reporting and evaluation of  
43  
44 375 such research.[8, 45] This study can help to address these gaps. The DE is being applied within a  
45  
46 376 project that has adapted a theory-based design linking the development of interventions with  
47  
48 377 modifiable barriers, enablers and identified improvement priorities.[23, 28] In addition to studying  
49  
50 378 the application of theory in the ESP project, the DE offers scope to test, identify and document those  
51  
52 379 elements essential to achieving the intended dissemination outcomes.  
53  
54  
55  
56  
57  
58  
59  
60

1  
2  
3 380 The ESP project acknowledges the importance of the sharing of tacit knowledge amongst  
4  
5 381 practitioners for addressing the 'know-do gap'.<sup>[46]</sup> Consistent with approaches advocated in recent  
6  
7 382 literature,<sup>[47, 48]</sup> it adopts a strategy that integrates knowledge production, translation and use  
8  
9 383 across disciplines.<sup>[49]</sup> It is being implemented with modest resources, utilising online methods of  
10  
11 384 report distribution and feedback, and relying on stakeholder 'buy-in' to enhance report distribution  
12  
13 385 and facilitate engagement. There is potential for the DE study to provide useful lessons about the  
14  
15 386 strengths and limitations of such an approach. The study will also contribute knowledge about the  
16  
17 387 conditions and factors that influence stakeholder engagement in wide-scale data interpretation and  
18  
19 388 knowledge co-production using CQI data, and the use of this evidence by various PHC stakeholders  
20  
21 389 and in differing contexts.  
22  
23  
24  
25 390 Finally, the DE study is supporting and evaluating a novel interactive dissemination strategy  
26  
27 391 implemented in the Australian Indigenous healthcare context, in which there is an urgent need to  
28  
29 392 ensure that knowledge from research impacts on driving healthcare improvements. The DE will  
30  
31 393 support the co-production and dissemination of knowledge by stakeholders working in this sector,  
32  
33 394 based on recent national-level CQI data from Australia Indigenous PHC centres – knowledge that can  
34  
35 395 be used to implement improvements at practitioner, team, health centre and higher system levels.  
36  
37 396 The lessons learnt about the potential for using aggregated CQI data for this purpose are expected  
38  
39 397 to be applicable to other healthcare contexts. Researchers, clinicians, policy-makers and managers  
40  
41 398 developing evidence-based system and policy interventions should benefit from this research. The  
42  
43 399 study will also help to address the current gap in the scientific literature about applying  
44  
45 400 developmental evaluation.  
46  
47  
48  
49  
50  
51  
52

## 53 402 **List of Abbreviations**

54  
55  
56 403 ABCD Audit and Best Practice for Chronic Disease  
57  
58  
59  
60

1  
2  
3 404 CQI continuous quality improvement  
4  
5  
6 405 DE developmental evaluation  
7  
8  
9 406 ESP *Engaging Stakeholders in Identifying Priority Evidence-practice Gaps and Strategies for*  
10  
11 407 *Improvement in Primary Health Care*  
12  
13  
14 408 PHC primary health care  
15  
16  
17  
18  
19  
20  
21  
22  
23  
24  
25  
26  
27  
28  
29  
30  
31  
32  
33  
34  
35  
36  
37  
38  
39  
40  
41  
42  
43  
44  
45  
46  
47  
48  
49  
50  
51  
52  
53  
54  
55  
56  
57  
58  
59  
60

|     |     |                                                                                                |
|-----|-----|------------------------------------------------------------------------------------------------|
| 404 | CQI | continuous quality improvement                                                                 |
| 405 | DE  | developmental evaluation                                                                       |
| 406 | ESP | <i>Engaging Stakeholders in Identifying Priority Evidence-practice Gaps and Strategies for</i> |
| 407 |     | <i>Improvement in Primary Health Care</i>                                                      |
| 408 | PHC | primary health care                                                                            |

### 410 **Figure 1 Legend**

411 CQI = continuous quality improvement

412 DE = developmental evaluation

413 ESP = Engaging Stakeholders in Identifying Priority Evidence-practice Gaps and Strategies  
414 for Improvement in Primary Health Care

415 PHC = primary health care

416 *Adapted from Togni, Askew et al. 2016*

### 418 **Authors' contributions**

419 AL planned the protocol, and wrote the manuscript with contributions and vital support from JB,  
420 VM, FC, GH, NP and RB. All authors read and approved the final version of the manuscript.

### 421 **Funding**

422 The ABCD National Research Partnership Project has been supported by funding from the National  
423 Health and Medical Research Council (545267) and the Lowitja Institute, and by in-kind and financial  
424 support from Community Controlled and Government agencies. Alison Laycock is supported by a

1  
2  
3 425 National Health and Medical Research Council Postgraduate Scholarship (1094595), and by the  
4  
5 426 Centre of Research Excellence: An Innovation Platform for Integrated Quality Improvement in  
6  
7 427 Indigenous Primary Health Care (CRE-IQI, funded by the NHMRC ID 1078927). Ross Bailie's work has  
8  
9 428 been supported by an Australian Research Council Future Fellowship (100100087). The views  
10  
11 429 expressed in this publication are those of the authors and do not necessarily reflect the views of the  
12  
13 430 funding agencies.

## 18 431 **Acknowledgements**

21 432 The development of this manuscript would not have been possible without the active support,  
22  
23 433 enthusiasm and commitment of staff in participating primary health care services, and members of  
24  
25 434 the ABCD National Research Partnership and the Centre for Research Excellence in Integrated  
26  
27 435 Quality Improvement in Indigenous Primary Health Care. The authors thank Samantha Togni for  
28  
29 436 feedback on Figure 1.

## 33 437 **Competing interests**

36  
37 438 The authors declare that they have no competing interests.

## 40 439 **References**

- 44 440 1. Australian Health Ministers' Advisory Council. Aboriginal and Torres Strait Islander Health  
45 441 Performance Framework 2014 Report. Canberra: 2015.  
46 442 2. Australian Institute of Health and Welfare. Australia's health 2016. Canberra: AIHW, 2016.  
47 443 3. O'Neill SM, Hempel S, Lim Y-W, *et al*. Identifying continuous quality improvement  
48 444 publications: what makes an improvement intervention 'CQI'? *BMJ Qual Saf*. 2011;20(12):1011-9.  
49 445 4. Bailie R, Matthews V, Brands J, *et al*. A systems-based partnership learning model for  
50 446 strengthening primary healthcare. *Implement Sci*. 2013;8:143.  
51 447 5. Bailie RS, Si D, O'Donoghue L, *et al*. Indigenous health: effective and sustainable health  
52 448 services through continuous quality improvement. *Med J Aust*. 2007;186(10):525-7.  
53 449 6. Ferlie EB, Shortell SM. Improving the Quality of Health Care in the United Kingdom and the  
54 450 United States: A Framework for Change. *Milbank Q*. 2001;79(2):281.  
55 451 7. Starfield B, Gervas J, Mangin D. Clinical Care and Health Disparities. *Annu Rev Public Health*.  
56 452 2012;33(1):89-106.

- 1
- 2
- 3 453 8. Gagliardi AR, Berta W, Kothari A, *et al.* Integrated knowledge translation (IKT) in health care:  
4 454 a scoping review. *Implement Sci.* 2016;11(1):38.
- 5 455 9. Anderson I, Robson B, Connolly M, *et al.* Indigenous and tribal peoples' health (The Lancet–  
6 456 Lowitja Institute Global Collaboration): a population study. *Lancet.* 2016;388(10040):131-57.
- 7 457 10. Baba JT, Brolan CE, Hill PS. Aboriginal medical services cure more than illness: a qualitative  
8 458 study of how Indigenous services address the health impacts of discrimination in Brisbane  
9 459 communities. *Int J Equity Health.* 2014;13(1):1-10.
- 10 460 11. Fiscella K, Sanders MR. Racial and Ethnic Disparities in the Quality of Health Care. *Annu Rev*  
11 461 *Public Health.* 2016;37:375-94.
- 12 462 12. Davy C, Cass A, Brady J, *et al.* Facilitating engagement through strong relationships between  
13 463 primary healthcare and Aboriginal and Torres Strait Islander peoples. *Aust N Z J Public Health.*  
14 464 2016:n/a-n/a.
- 15 465 13. Kothari AR, Bickford JJ, Edwards N, *et al.* Uncovering tacit knowledge: a pilot study to  
16 466 broaden the concept of knowledge in knowledge translation. *BMC Health Serv Res.* 2011;11:198-.
- 17 467 14. Lopez-Class M, Peprah E, Zhang X, *et al.* A Strategic Framework for Utilising Late-Stage (T4)  
18 468 Translational Research to Address Health Inequities. *Ethn Dis.* 2016;26(3).
- 19 469 15. Rey L, Tremblay M, Brousselle A. Managing Tensions between Evaluation and Research:  
20 470 Illustrative Cases of Developmental Evaluation in the Context of Research. *Am J Eval.* 2014;35(1):45-  
21 471 60.
- 22 472 16. Conklin J, Farrell B, Ward N, *et al.* Developmental evaluation as a strategy to enhance the  
23 473 uptake and use of deprescribing guidelines: protocol for a multiple case study. *Implement Sci.*  
24 474 2015;10(1):91.
- 25 475 17. Patton MQ. *Essentials of Utilization-Focused Evaluation.* Thousand Oaks, California: Sage  
26 476 Publishing; 2012.
- 27 477 18. Gagnon M. Knowledge dissemination and exchange of knowledge Ottawa: Canadian  
28 478 Institutes of Health Research; 2010. Available from: <http://www.cihr-irsc.gc.ca/e/41953.html>.
- 29 479 19. Hummelbrunner R. Systems thinking and evaluation. *Eval.* 2011;17(4):395-403.
- 30 480 20. Patton MQ. *Developmental Evaluation: Applying Complexity Concepts to Enhance*  
31 481 *Innovation and Use.* New York: The Guilford Press; 2011.
- 32 482 21. Patton MQ, McKegg K, Wehipeihana N. *Developmental Evaluation Exemplars: Principles in*  
33 483 *Practice.* 1st ed. New York: The Guildford Press; 2016.
- 34 484 22. Dozois E, Langlois M, Blanchet-Cohen N. DE 201: A practitioner's guide to developmental  
35 485 evaluation: The J.W. McConnell Family Foundation and the International Institute for Child Rights  
36 486 and Development; 2010.
- 37 487 23. Laycock A, Bailie J, Matthews V, *et al.* Interactive dissemination: engaging stakeholders in  
38 488 the use of aggregated quality improvement data for system-wide change in Australian Indigenous  
39 489 primary health care. *Front Public Health.* 2016;4.
- 40 490 24. Bailie J, Laycock A, Matthews V, *et al.* System-Level Action Required for Wide-Scale  
41 491 Improvement in Quality of Primary Health Care: Synthesis of Feedback from an Interactive Process  
42 492 to Promote Dissemination and Use of Aggregated Quality of Care Data. *Front Public Health.*  
43 493 2016;4:86.
- 44 494 25. Bailie R, Si D, Shannon C, *et al.* Study protocol: national research partnership to improve  
45 495 primary health care performance and outcomes for Indigenous peoples. *BMC Health Serv Res.*  
46 496 2010;10:129.
- 47 497 26. Grimshaw JM, Eccles MP, Lavis JN, *et al.* Knowledge translation of research findings.  
48 498 *Implement Sci.* 2012;7:50.
- 49 499 27. Hailey D, Grimshaw J, Eccles M, *et al.* *Effective Dissemination of Findings from Research*  
50 500 *Edmonton, AB, CA: Institute of Health Economics, 2008.*
- 51 501 28. French SD, Green SE, O'Connor DA, *et al.* Developing theory-informed behaviour change  
52 502 interventions to implement evidence into practice: a systematic approach using the Theoretical  
53 503 Domains Framework. *Implement Sci.* 2012;7:38-.
- 54
- 55
- 56
- 57
- 58
- 59
- 60

- 1  
2  
3 504 29. Michie S, Johnston M, Abraham C, *et al.* Making psychological theory useful for  
4 505 implementing evidence based practice: a consensus approach. *Qual Saf Health Care.* 2005;14(1):26-  
5 506 33.  
6 507 30. Huijg JM, Gebhardt WA, Crone MR, *et al.* Discriminant content validity of a theoretical  
7 508 domains framework questionnaire for use in implementation research. *Implement Sci.* 2014;9(11).  
8 509 31. Wagner EH, Austin BT, Davis C, *et al.* Improving chronic illness care: translating evidence into  
9 510 action: interventions that encourage people to acquire self-management skills are essential in  
10 511 chronic illness care. *Health Aff.* 2001;20(6):64-78.  
11 512 32. Schierhout G, Hains J, Si D, *et al.* Evaluating the effectiveness of a multifaceted, multilevel  
12 513 continuous quality improvement program in primary health care: developing a realist theory of  
13 514 change. *Implement Sci.* 2013;8:119.  
14 515 33. Tugwell P, Robinson V, Grimshaw J, *et al.* Systematic reviews and knowledge translation. *Bull*  
15 516 *World Health Organ.* 2006;84(8):643-51.  
16 517 34. Jackson C, Greenhalgh T. Co-creation: a new approach to optimising research impact? *Med J*  
17 518 *Aust.* 2015;203(7):2.  
18 519 35. Thomas G. A Typology for the Case Study in Social Science Following a Review of Definition,  
19 520 Discourse, and Structure. *Qual Inq.* 2011;17(6):511-21.  
20 521 36. Yin R. Case study research: design and methods: Sage Publication; 2009.  
21 522 37. Baker GR. The contribution of case study research to knowledge of how to improve quality  
22 523 of care. *BMJ Qual Saf.* 2011;20:i30-5.  
23 524 38. Malterud K, Siersma VD, Guassora AD. Sample Size in Qualitative Interview Studies: Guided  
24 525 by Information Power. *Qual Health Res.* 2015;1(8).  
25 526 39. Harvey G, Kitson A. Implementing Evidence-based Practice in Healthcare: A Facilitation  
26 527 Guide. London, United Kingdom: Taylor & Francis Ltd; 2015.  
27 528 40. Patton MQ. Qualitative Evaluation and Research Methods. 3rd ed. Thousand Oaks,  
28 529 California, USA: Sage; 2002.  
29 530 41. Rolfe G, Freshwater D, Jasper M. Critical reflection for nursing and the helping professions: a  
30 531 user's guide. Basingstoke: Palgrave Macmillan; 2001.  
31 532 42. Creswell J, Klassen A, Plano Clark V, *et al.* Best Practices for Mixed Methods Research in the  
32 533 Health Sciences. USA: Office of Behavioral and Social Sciences Research (OBSSR), 2011.  
33 534 43. Fetters MD, Freshwater D. The 1 + 1 = 3 Integration Challenge. *J Mix Methods Res.*  
34 535 2015;9(2):115-7.  
35 536 44. Davies P, Walker AE, Grimshaw JM. A systematic review of the use of theory in the design of  
36 537 guideline dissemination and implementation strategies and interpretation of the results of rigorous  
37 538 evaluations. *Implement Sci.* 2010;5:14.  
38 539 45. Greenhalgh T, Robert G, Macfarlane F, *et al.* Diffusion of Innovations in Service  
39 540 Organizations: Systematic Review and Recommendations. *Milbank Q.* 2004;82(4):581-629.  
40 541 46. Greenhalgh T, Wieringa S. Is it time to drop the 'knowledge translation' metaphor? A critical  
41 542 literature review. *J R Soc Med.* 2011;104(12):501-9.  
42 543 47. Bowen SJ, Graham ID. From knowledge translation to engaged scholarship: promoting  
43 544 research relevance and utilization. *Arch Phys Med Rehabil.* 2013;94(1 Suppl):S3-S8.  
44 545 48. Rycroft-Malone J, Christopher R., Bucknal T, *et al.* Collaboration and Co-Production of  
45 546 Knowledge in Healthcare: Opportunities and Challenges. *Int J Health Policy Manag.* 2016;5(4):221-3.  
46 547 49. Kothari A, Wathen CN. A critical second look at integrated knowledge translation. *Health*  
47 548 *Policy.* 2013;109(2):187-91.  
48  
49  
50  
51  
52  
53  
54  
55  
56  
57  
58  
59  
60

## 550 Supplementary Files

551 Supplementary file 1 – Explicit survey items for DE Phase 1 ESP



- 1
- 2
- 3 552 **Supplementary file 2 – Explicit survey items for DE Phase 2 ESP**
- 4 553 **Supplementary file 3 – Explicit survey items for DE Phase 3 ESP**
- 5 554 **Supplementary file 4 – Explicit survey items for DE Draft Final ESP Report**
- 6
- 7 555
- 8
- 9
- 10
- 11
- 12
- 13
- 14
- 15
- 16
- 17
- 18
- 19
- 20
- 21
- 22
- 23
- 24
- 25
- 26
- 27
- 28
- 29
- 30
- 31
- 32
- 33
- 34
- 35
- 36
- 37
- 38
- 39
- 40
- 41
- 42
- 43
- 44
- 45
- 46
- 47
- 48
- 49
- 50
- 51
- 52
- 53
- 54
- 55
- 56
- 57
- 58
- 59
- 60

For peer review only

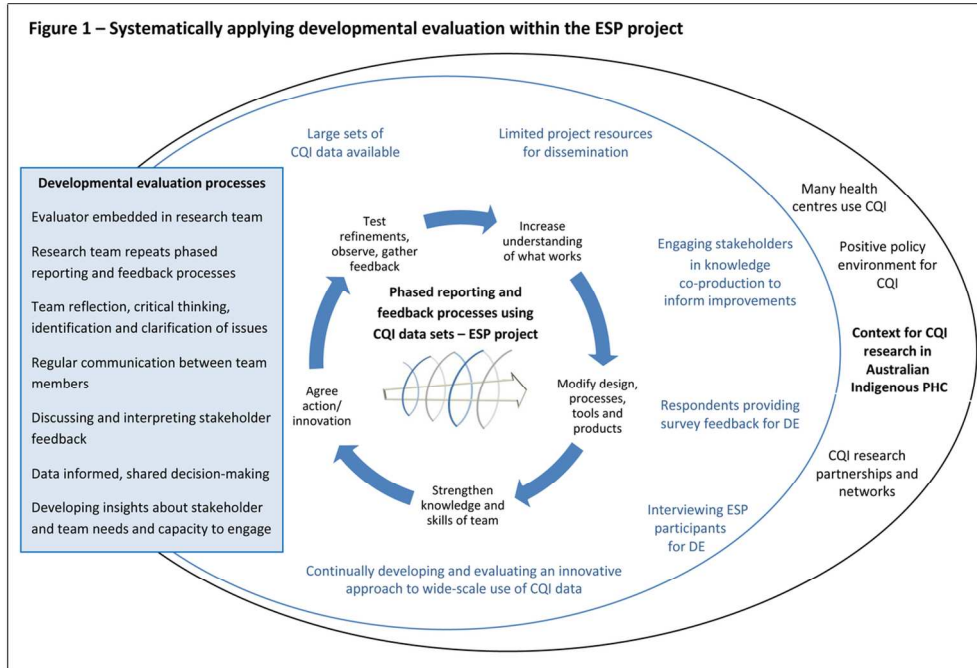

CQI = continuous quality improvement;

DE = developmental evaluation;

ESP = Engaging Stakeholders in Identifying Priority Evidence-practice Gaps and Strategies for Improvement in Primary Health Care;

PHC = primary health care

Adapted from Togni, Askew et al. 2016

116x77mm (300 x 300 DPI)

only

## PHASE 1 SURVEY

### *'Engaging Stakeholders in Identifying Priority Evidence-Practice Gaps and Strategies for Improvement in Primary Health Care (ESP)' Project*

#### Specific survey questions relating to presentation of information and project processes

---

#### Example: ESP process for Child Health

---

#### Feedback on how information was presented

Questions relate to three specific parts of the report:

1. The introduction (first 2 pages)
2. The summary of priorities (page 34)
3. The body of the report and presentation of data in tables

#### Introduction of the report (pgs 1-2)

1. How well did this introduction to the report explain:
  - What you would find in the report? [very well, well, not very well, poorly]
  - The purpose of the project (including this survey)? [very well, well, not very well, poorly]
  - Why you might want to take part in the project? [very well, well, not very well, poorly]
  - What you would be required to do? [very well, well, not very well, poorly]
  - Future phases of the project? [very well, well, not very well, poorly]
2. How could the introduction of the report be improved? [Free text response]

#### Summary of priorities from national data (pgs 3-4)

3. How well did this summary of suggested priorities:
  - Present information in a way that was easy to read? [very well, well, not very well, poorly]
  - Present information in a way that was easy to use? [very well, well, not very well, poorly]
  - Capture the implications of the data contained in the body of the report? [very well, well, not very well, poorly]
4. How could the summary of priorities (pgs 3-4) be improved? [Free text response]

#### Body of the report

The body of the report presents data about each indicator of the quality of health care being provided for Aboriginal and Torres Strait Islander children and relevance to best practice guidelines.

5. How well does the body of the report:
  - Present information in a way that is easy to read? [very well, well, not very well, poorly]

- 1  
2  
3  
4 — Present information in a way that is easy to use? [very well, well, not very well, poorly]  
5  
6 — Clearly explain the data about each indicator of the quality of health care provided? [very  
7 well, well, not very well, poorly]  
8 — Clearly explain the implications of these data in terms of best practice guidelines? [very well,  
9 well, not very well, poorly]  
10 — Give you confidence in the accuracy of the information presented? [very well, well, not very  
11 well, poorly]  
12  
13 6. How could the body of the report be improved? [Free text response]  
14  
15 7. Overall, how well does the whole report:  
16 — Present information in a way that is easy for you to read? [very well, well, not very well,  
17 poorly]  
18 — Present information in a way that is easy for you to use? [very well, well, not very well,  
19 poorly]  
20 — Provide information that is useful to you? [very well, well, not very well, poorly]  
21 — Provide information that you would not otherwise have had access to? [very well, well, not  
22 very well, poorly]  
23 — Provide information that is credible? [very well, well, not very well, poorly]  
24 — Encourage discussion about ways of improving child health care (generally)? [very well, well,  
25 not very well, poorly]  
26 — Encourage discussion about improving specific aspects of child health care? [very well, well,  
27 not very well, poorly]  
28 — Encourage action to make improvements in specific aspects of child health care? [very well,  
29 well, not very well, poorly]  
30  
31  
32  
33  
34 8. Any other comments? [Free text response]  
35  
36  
37  
38  
39  
40  
41  
42  
43  
44  
45  
46  
47  
48  
49  
50  
51  
52  
53  
54  
55  
56  
57  
58  
59  
60

## PHASE 2 SURVEY

### *'Engaging Stakeholders in Identifying Priority Evidence-Practice Gaps and Strategies for Improvement in Primary Health Care (ESP)' Project*

Specific survey questions relating to presentation of information and project processes

---

#### Example: ESP process for Child Health

---

We are seeking feedback on how information was presented in the report on 'Trends over Time in Key Indicators of Priority Evidence-Practice Gaps in Child Health'

Your feedback will help us improve future reports.

1. Overall, how well does the report:
  - Present information in a way that is easy for you to read and understand? [very well, well, not very well, poorly]
  - Present information in a way that is easy for you to use? [very well, well, not very well, poorly]
  - Provide information that is useful to you? [very well, well, not very well, poorly]
  - Encourage discussion about the barriers and enablers for addressing the priority evidence-practice gaps for child health? [very well, well, not very well, poorly]
2. Do you have suggestions about how to improve the presentation and usefulness of the refined report, or how it could be changed to encourage discussion? [Free text response]
3. Do you have any comments or suggestions about how to improve future ESP Project surveys? [Free text response]

## PHASE 3 SURVEY

### *'Engaging Stakeholders in Identifying Priority Evidence-Practice Gaps and Strategies for Improvement in Primary Health Care (ESP)' Project*

#### Specific survey questions relating to presentation of information and project processes

---

#### Example: ESP process for Child Health

---

#### Feedback on the report

1. Overall, how well does the report:
  - Present information in a way that is relevant and useful to you? [very well, well, not very well, poorly]
  - Present information in a way that is easy for you to read and understand? [very well, well, not very well, poorly]
  - Present information that is easy to use? [very well, well, not very well, poorly]
  - Provide information that you would not otherwise have had access to? [very well, well, not very well, poorly]
  - Encourage discussion about the barriers, enablers and strategies for closing the priority evidence-practice gaps for child health? [very well, well, not very well, poorly]
2. Any other comments? [Free text response]

#### Feedback on the evidence brief

Overall, how well does the evidence brief:

- Present evidence that is relevant and useful to you? [poorly, not very well, well, very well]
  - Present evidence that is credible? [poorly, not very well, well, very well]
  - Present information in a way that is easy for you to read and understand? [poorly, not very well, well, very well]
  - Present information in a way that is easy for you to use? [poorly, not very well, well, very well]
  - Encourage discussion about barriers, enablers and strategies for closing the priority evidence-practice gaps for child health? [poorly, not very well, well, very well]
3. To what extent does the evidence brief:
    - Provide information that is new to you? [not at all, not much, somewhat, quite a bit, a great deal]
    - Increase your understanding of the evidence about what works in making improvements in the quality of Aboriginal and Torres Strait Islander primary health care? [not at all, not much, somewhat, quite a bit, a great deal]

- 1  
2  
3  
4 — Increase your confidence in taking action to bring about improvements in the quality of  
5 Aboriginal and Torres Strait Islander primary health care? [not at all, not much, somewhat,  
6 quite a bit, a great deal]  
7 — Change how you will approach making improvements in the quality of Aboriginal and Torres  
8 Strait Islander primary health care? [not at all, not much, somewhat, quite a bit, a great  
9 deal, N/A]  
10

11 4. How do you rate the evidence brief in terms of its:

- 12  
13 — Content? [Very poor, poor, okay, good, very good]  
14 — Language? [Very poor, poor, okay, good, very good]  
15 — Presentation? [Very poor, poor, okay, good, very good]  
16  
17

18  
19 5. Do you have suggestions about how to improve the content, language, presentation, and/or  
20 usefulness of the evidence brief, or how it could be changed to encourage discussion? [Free  
21 text response]  
22

23 **Feedback on this survey**

24  
25 6. Do you have any comments or suggestions about how to improve future ESP Project surveys?  
26 [Free text response]  
27  
28  
29  
30  
31  
32  
33  
34  
35  
36  
37  
38  
39  
40  
41  
42  
43  
44  
45  
46  
47  
48  
49  
50  
51  
52  
53  
54  
55  
56  
57  
58  
59  
60

## SURVEY – DRAFT FINAL ESP REPORT

### *'Engaging Stakeholders in Identifying Priority Evidence-Practice Gaps and Strategies for Improvement in Primary Health Care (ESP)' Project*

Specific survey questions relating to presentation of information and project processes

---

#### Example: ESP process for Child Health

---

#### Feedback on presentation

1. We are interested in your views on presentation of information and content of this report. How well does the presentation of information and content of the report meet your needs? [very well, well, not very well, poorly]
2. If your response to the above question was 'poorly' or 'not well', please provide suggestions for how the presentation could be improved. [Free Text].

#### Feedback on the ESP Project processes

We have used a phased approach to encourage engagement with data by key stakeholders, and to identify strategies to address priority evidence-practice gaps. Your feedback on the Child Health ESP Project processes will help us refine ESP processes for other areas of care.

3. Has the process of cyclical engagement improved your understanding of the CQI data? Please comment on this. [Free Text]
4. Have you used the information provided through this process? If so, how? [Free Text]
5. To help us improve the ESP process, please provide comment on any stakeholder perceptions that may not have been reflected in the survey responses. [Free Text]
6. Please provide any further comments on this phased approach to engage with and use data to inform decision making. [Free Text]
7. Please provide suggestions for dissemination for the Final Child Health Report. [Free Text]



# BMJ Open

## A developmental evaluation to enhance stakeholder engagement in a wide-scale interactive project disseminating quality improvement data: study protocol for a mixed-methods study

|                                 |                                                                                                                                                                                                                                                                                                                                                                                                                                                                                                                                                                                                                                                                                   |
|---------------------------------|-----------------------------------------------------------------------------------------------------------------------------------------------------------------------------------------------------------------------------------------------------------------------------------------------------------------------------------------------------------------------------------------------------------------------------------------------------------------------------------------------------------------------------------------------------------------------------------------------------------------------------------------------------------------------------------|
| Journal:                        | <i>BMJ Open</i>                                                                                                                                                                                                                                                                                                                                                                                                                                                                                                                                                                                                                                                                   |
| Manuscript ID                   | bmjopen-2017-016341.R1                                                                                                                                                                                                                                                                                                                                                                                                                                                                                                                                                                                                                                                            |
| Article Type:                   | Protocol                                                                                                                                                                                                                                                                                                                                                                                                                                                                                                                                                                                                                                                                          |
| Date Submitted by the Author:   | 28-Apr-2017                                                                                                                                                                                                                                                                                                                                                                                                                                                                                                                                                                                                                                                                       |
| Complete List of Authors:       | Laycock, Alison; Charles Darwin University, Menzies School of Health Research<br>Baillie, Jodie; The University of Sydney, University Centre for Rural Health<br>Matthews, Veronica; The University of Sydney, University Centre for Rural Health<br>Cunningham, Frances; Charles Darwin University, Menzies School of Health Research<br>Harvey, Gillian; University of Adelaide, Adelaide Nursing School; The University of Manchester, Alliance Manchester Business School<br>Percival, Nikki; University of Technology Sydney, The Australian Centre for Public and Population Health Research<br>Baillie, Ross; The University of Sydney, University Centre for Rural Health |
| <b>Primary Subject Heading</b>: | Health services research                                                                                                                                                                                                                                                                                                                                                                                                                                                                                                                                                                                                                                                          |
| Secondary Subject Heading:      | Public health                                                                                                                                                                                                                                                                                                                                                                                                                                                                                                                                                                                                                                                                     |
| Keywords:                       | developmental evaluation, interactive dissemination, primary health care, indigenous, quality improvement, stakeholder engagement                                                                                                                                                                                                                                                                                                                                                                                                                                                                                                                                                 |
|                                 |                                                                                                                                                                                                                                                                                                                                                                                                                                                                                                                                                                                                                                                                                   |

1  
2  
3 **1 A developmental evaluation to enhance stakeholder engagement in**  
4 **2 a wide-scale interactive project disseminating quality improvement**  
5 **3 data: study protocol for a mixed-methods study**  
6  
7  
8

9 4 Alison Laycock<sup>1</sup>, Jodie Bailie<sup>2</sup>, Veronica Matthews<sup>2</sup>, Frances Cunningham<sup>1</sup>, Gillian Harvey<sup>3</sup>, Nikki  
10 Percival<sup>4</sup>, Ross Bailie<sup>2</sup>  
11

12 6 <sup>1</sup>Menzies School of Health Research, Charles Darwin University, Casuarina, NT, Australia

13 7 <sup>2</sup>University Centre for Rural Health, the University of Sydney, Lismore, NSW, Australia

14 8 <sup>3</sup>Adelaide Nursing School, The University of Adelaide, Adelaide, SA Australia; Alliance Manchester  
15 Business School, The University of Manchester, Manchester, United Kingdom  
16

17 9 <sup>4</sup>The Australian Centre for Public and Population Health Research, University of Technology Sydney,  
18 Sydney, NSW, Australia  
19  
20

21 10  
22 11  
23 12  
24 13 Corresponding author: Alison Laycock, [alison.laycock@menzies.edu.au](mailto:alison.laycock@menzies.edu.au)

25 14 Menzies School of Health Research, Charles Darwin University  
26 15 PO Box 41096  
27 16 Casuarina NT 0811  
28 17 Australia  
29

30 18 Ph: +61 419 824341

31 19 Fax: +61 8 8946 8464

32 20 Alison Laycock, Email: [alison.laycock@menzies.edu.au](mailto:alison.laycock@menzies.edu.au)

33 21 Jodie Bailie, Email: [jodie.bailie@sydney.edu.au](mailto:jodie.bailie@sydney.edu.au)

34 22 Veronica Matthews, Email: [veronica.matthews@sydney.edu.au](mailto:veronica.matthews@sydney.edu.au)

35 23 Frances Cunningham, Email: [frances.cunningham@menzies.edu.au](mailto:frances.cunningham@menzies.edu.au)

36 24 Gillian Harvey, Email: [Gillian.Harvey@adelaide.edu.au](mailto:Gillian.Harvey@adelaide.edu.au)

37 25 Nikki Percival, Email: [Nikki.percival@uts.edu.au](mailto:Nikki.percival@uts.edu.au)

38 26 Ross Bailie, Email: [ross.bailie@sydney.edu.au](mailto:ross.bailie@sydney.edu.au)  
39  
40  
41

42 27  
43 28 **Word count:** 3869 (+ Strengths and Limitations section = 108)

44 29 **Key words** – developmental evaluation, interactive dissemination, stakeholder engagement, primary  
45 30 health care, indigenous, quality improvement  
46  
47  
48  
49  
50  
51  
52  
53  
54  
55  
56  
57  
58  
59  
60

1  
2  
3 31 **ABSTRACT**  
4  
5

6 32 **INTRODUCTION:**  
7  
8

9 33 Bringing together continuous quality improvement (CQI) data from multiple health services offers  
10 34 opportunities to identify common improvement priorities, and to develop interventions at various  
11 35 system levels to achieve large-scale improvement in care. An important principle of CQI is  
12 36 practitioner participation in interpreting data and planning evidence-based change. This study will  
13 37 contribute knowledge about engaging diverse stakeholders in collaborative and theoretically-  
14 38 informed processes to identify and address priority evidence-practice gaps in care delivery. This  
15 39 paper describes a developmental evaluation to support and refine a novel interactive dissemination  
16 40 project using aggregated CQI data from Aboriginal and Torres Strait Islander primary healthcare  
17 41 centres in Australia. The project aims to effect multi-level system improvement in Aboriginal and  
18 42 Torres Strait Islander primary healthcare.  
19  
20  
21  
22  
23  
24  
25  
26  
27  
28  
29  
30

31 43 **METHODS AND ANALYSIS:** Data will be gathered using document analysis, online surveys, interviews  
32 44 with participants and iterative analytical processes with the research team. These methods will  
33 45 enable real-time feedback to guide refinements to the design, reports, tools and processes as the  
34 46 interactive dissemination project is implemented. Qualitative data from interviews and surveys will  
35 47 be analysed and interpreted to provide in-depth understanding of factors that influence engagement  
36 48 and stakeholder perspectives about use of the aggregated data and generated improvement  
37 49 strategies. Sources of data will be triangulated to build up a comprehensive, contextualised  
38 50 perspective and integrated understanding of the project's development, implementation and  
39 51 findings.  
40  
41  
42  
43  
44  
45  
46  
47  
48  
49  
50  
51

52 52 **ETHICS AND DISSEMINATION:**  
53  
54

55 53 The Human Research Ethics Committee (HREC) of the Northern Territory Department of Health and  
56 54 Menzies School of Health Research (Project 2015-2329), the Central Australian HREC (Project 15-  
57  
58  
59  
60

1  
2  
3 55 288), and the Charles Darwin University HREC (Project H15030) approved the study. Dissemination  
4 56 will include articles in peer-reviewed journals, policy and research briefs. Results will be presented at  
5 57 conferences and quality improvement network meetings. Researchers, clinicians, policy-makers and  
6 58 managers developing evidence-based system and policy interventions should benefit from this  
7  
8  
9 59 research.  
10  
11  
12 60

## 61 **STRENGTHS AND LIMITATIONS OF THIS STUDY**

- 62 • Use of mixed methods and inclusion of perspectives of the research team and diverse  
63 healthcare stakeholders enhances validity and provides comprehensive data.
- 64 • The developmental evaluation is being applied within an iterative dissemination project.  
65 Each iteration provides opportunities to evaluate and refine implementation processes and  
66 reports in response to researcher, participant and data collection needs.
- 67 • The dissemination approach encourages stakeholders to send reports and surveys to others,  
68 limiting ability to measure the reach or response rates as part of the evaluation.
- 69 • The evaluator is a team member and evaluates the research team's work. Potential lack of  
70 objectivity is offset by continuing opportunities for reflexivity, sense-making and timely  
71 project adaptations.

## 73 **INTRODUCTION**

### 74 **Background**

75 Improving the implementation of evidence-based healthcare is a complex enterprise. It involves the  
76 production, translation and use of knowledge by researchers, policy-makers, service providers and  
77 consumers. Using evidence to improve the quality of primary health care (PHC) services for

1  
2  
3 78 Aboriginal and Torres Strait Islander people (Australia's Indigenous nations) is critically important in  
4  
5 79 Australia, where Indigenous people experience an unacceptable burden of ill health, shorter life  
6  
7 80 expectancy and poorer access to PHC services compared with the general population.[1, 2]  
8  
9  
10 81 A number of health centre teams that serve Indigenous communities use continuous quality  
11  
12 82 improvement (CQI) tools and processes to make evidence-based improvements in the care they  
13  
14 83 deliver. CQI is inherently participatory; it generates and uses data and iterative processes to plan  
15  
16 84 interventions, typically at the team or health centre level. It applies strategies that are known to be  
17  
18 85 effective in knowledge translation, such as audit and feedback and goal setting.[3-5]  
19  
20  
21 86 Improvement interventions have a higher probability of success when system changes are  
22  
23 87 implemented concurrently at several levels – individual care processes, group or team work, the  
24  
25 88 organization, and the larger system and policy environment.[6, 7] Despite developments in CQI  
26  
27 89 theory and practice, there is a gap in the literature about how to engage stakeholders in wide-scale  
28  
29 90 CQI processes to address improvement barriers and inform the development of system  
30  
31 91 strengthening strategies. There is also a need for knowledge about how different knowledge  
32  
33 92 translation strategies influence outcomes.[8]  
34  
35  
36  
37 93 Bringing together CQI data from multiple PHC centres provides scope to use CQI in a different way. It  
38  
39 94 offers opportunities to engage diverse stakeholders in identifying common priorities for improving  
40  
41 95 care and interventions that target change at various levels of the health system. This paper describes  
42  
43 96 the study protocol for the use of developmental evaluation (DE) to evaluate and strengthen a novel  
44  
45 97 theory-informed wide-scale interactive dissemination project engaging diverse stakeholders  
46  
47 98 involved in Australian Indigenous healthcare. Titled 'Engaging Stakeholders in Identifying Priority  
48  
49 99 Evidence-Practice Gaps and Strategies for Improvement in Primary Health Care (ESP), the project  
50  
51 100 disseminates aggregated CQI data from 175 PHC centres serving Indigenous people, for the purpose  
52  
53 101 of informing improvement interventions at different levels of the health system. These centres  
54  
55  
56  
57  
58  
59  
60

1  
2  
3 102 contributed their data to a research program under a partnership agreement. The relationship  
4  
5 103 between the research program, the ESP project and the DE is shown in Figure 1.  
6  
7

8 104 **[INSERT FIGURE 1]**  
9

### 10 105 **The study context - Australian Indigenous primary health care and quality improvement**

11  
12  
13  
14 106 Despite universal coverage for healthcare services through Medicare and specific funding for  
15  
16 107 Indigenous PHC services, there is a significant and persistent disparity between the health and life  
17  
18 108 expectancy of Indigenous and non-Indigenous Australians.[2, 9] The disparity is well documented. It  
19  
20 109 relates to a history of colonisation and disempowerment, ongoing racial, social, educational and  
21  
22 110 economic inequalities and lack of access to culturally safe service provision.[1, 10] Indigenous people  
23  
24 111 access PHC through Indigenous community-controlled health services and government-operated  
25  
26 112 PHC centres specifically established to meet the needs of Aboriginal and Torres Strait Islander  
27  
28 113 people, and through private general practices. PHC delivery settings are geographically diverse and  
29  
30 114 vary in population density, governance arrangements and resource provision.  
31  
32  
33

34 115 Reducing healthcare disparities requires CQI and system strengthening approaches that address the  
35  
36 116 complexities of the PHC delivery environment and draw on data about clinical care and utilisation of  
37  
38 117 services.[7, 11] In Indigenous PHC, this calls for approaches that incorporate the needs and values of  
39  
40 118 Indigenous communities,[12] make optimal use of health service performance data and utilise the  
41  
42 119 professional and contextual knowledge of those working in the sector.[5, 13] It involves policy  
43  
44 120 change and improvement interventions at various system levels.[6, 14]  
45  
46  
47

### 48 121 **Developmental evaluation**

49  
50  
51 122 Developmental evaluation (DE) is gaining recognition as a useful approach for implementation  
52  
53 123 research.[15, 16] Evolving from utilisation-focused evaluation[17] and drawing on tools and methods  
54  
55 124 from a variety of disciplines, DE can be used to address complex health system issues that require  
56  
57 125 engagement of multiple stakeholders in both the research and change processes.[18]  
58  
59  
60

1  
2  
3 126 DE is typically embedded in the project context and involves continuous feedback to inform  
4  
5 127 innovators, often with the evaluator positioned within a project or program team. It is well suited to  
6  
7 128 adapting projects or interventions implemented under complex conditions, or emergent situations in  
8  
9 129 which multiple influences make it difficult to predict what will happen as a project or strategy  
10  
11 130 progresses.[19, 20] DE has been used, for example, to support change through team dialogue, to  
12  
13 131 innovate health and recreation programs in Indigenous communities, to develop principles and  
14  
15 132 collaborative processes between agencies working to address difficult social and economic issues,  
16  
17 133 and to engage communities of practice in complex systems change.[21] Challenges in DE include  
18  
19 134 managing uncertainty and ambiguity, the volume of data and maintaining a results focus.[22]  
20  
21  
22  
23 135 To our knowledge, DE has not previously been used in a project involving CQI or dissemination of  
24  
25 136 data, nor applied in order to 'study a study'. While this made methodology development  
26  
27 137 challenging, the available DE literature suggests that DE aligns well with a project that has  
28  
29 138 developmental purpose, is committed to engaging stakeholders with research evidence and to  
30  
31 139 contributing to the science of implementation. The benefits of having an 'embedded evaluator', such  
32  
33 140 as timely feedback, discussion and sense-making to inform adaptive decision-making,[15,21] were  
34  
35 141 influential in selecting a DE approach.  
36  
37  
38

#### 39 142 **Aims of the developmental evaluation (DE) study**

40  
41  
42 143 The aim of the DE study is to evaluate and enhance a novel interactive dissemination project  
43  
44 144 designed to engage PHC stakeholders in Indigenous PHC in wide-scale processes to interpret and use  
45  
46 145 aggregated CQI data.  
47

48  
49 146 The objectives of the DE study are to:  
50

- 51  
52 147 • Develop and refine the design, reports, processes and resources used in the interactive  
53  
54 148 dissemination project  
55  
56  
57  
58  
59  
60

- 1  
2  
3 149 • Explore the barriers and facilitators to stakeholder engagement in the interactive  
4  
5 150 dissemination project  
6  
7 151 • Identify the actual or intended use of the aggregated CQI data and co-produced knowledge  
8  
9 152 by different stakeholders, and factors influencing use  
10  
11 153 • Assess the overall effectiveness of the interactive dissemination processes used in the ESP  
12  
13 154 project

155 **The ‘Engaging Stakeholders in Identifying Priority Evidence-Practice Gaps and Strategies for**  
156 **Improvement in Primary Health Care (ESP)’ project – an opportunity for learning and innovation**  
157 **through DE**

158 Described in a separate paper, the ‘Engaging Stakeholders in Identifying Priority Evidence-Practice  
159 Gaps and Strategies for Improvement in Primary Health Care (ESP)’ project,[23] aims to engage  
160 stakeholders with aggregated data and promote wide-scale improvements in quality of care by  
161 applying a system-wide approach to CQI.[24] The ESP project utilises a comprehensive CQI dataset  
162 collected for the Audit and Best Practice for Chronic Disease (ABCD) National Research Partnership  
163 (2010 – 2014).[4, 25]

164 Over more than a decade, PHC centres participating in the ABCD National Research Partnership  
165 (Partnership) used evidence-based best-practice clinical record audit and system assessment tools to  
166 assess and reflect on system performance, interpreting the data to identify improvement priorities  
167 and develop strategies appropriate to their service population and delivery contexts.[5] Available  
168 ABCD CQI tools cover various aspects of PHC (e.g., chronic illness, preventive and maternal care).

169 In addition to their routine use of these tools as part of their Plan-Do-Study-Act CQI processes, 175  
170 PHC centres involved in the Partnership voluntarily provided service-level de-identified CQI data for  
171 analysis. These audit data, based on almost 60,000 audits of patient records and 492 systems  
172 assessments, provide a unique opportunity to utilise aggregated health centre performance data for



1  
2  
3 173 wide-scale system improvement and population health benefit, and to explore innovative ways to  
4  
5 174 engage healthcare stakeholders with evidence.  
6  
7

8 175 Aiming to support understanding and use of these data through an interactive exchange between  
9  
10 176 healthcare researchers and stakeholders, the ESP project draws on explicit and practical knowledge,  
11  
12 177 and different types of expertise, to identify improvement strategies aligned with implementation  
13  
14 178 settings.[23, 26, 27]  
15  
16

17 179 The ESP project design is adapted from systematic methods that aim to link interventions to  
18  
19 180 modifiable barriers to address evidence-practice gaps.[28] Four phases of online report distribution  
20  
21 181 and feedback will involve stakeholders in data interpretation and knowledge-co-production, as  
22  
23 182 follows:  
24  
25

- 26  
27 183 1. *Phase One: Identification of priority evidence-practice gaps.* Stakeholders receive a report of  
28  
29 184 aggregated cross-sectional CQI data and complete an online survey.  
30  
31 185 2. *Phase Two: Identification of barriers and enablers to addressing gaps in care identified in*  
32  
33 186 *Phase 1.* Stakeholders receive a report of trend data relevant to the identified priority  
34  
35 187 evidence-practice gaps. They complete an online survey about influences on individual  
36  
37 188 behaviours, health centre and wider systems. The survey questions are based on the  
38  
39 189 theoretical domains framework[29, 30] and on other models identifying barriers to the  
40  
41 190 effective functioning of health centre and higher level systems.[31-33]  
42  
43 191 3. *Phase 3: Identification of strategies for improvement.* Provided with findings from phases 1  
44  
45 192 and 2, and an evidence summary about CQI implementation, stakeholders are asked to  
46  
47 193 suggest strategies likely to be effective in addressing modifiable barriers and strengthening  
48  
49 194 enablers.  
50  
51 195 4. In the final phase, respondents are asked to review the draft final report and provide  
52  
53 196 feedback on the overall findings in the specific clinical care area.  
54  
55  
56  
57  
58  
59  
60

1  
2  
3 197 Separate processes will be implemented using audit data collected for child, maternal, preventive  
4  
5 198 and mental health, chronic illness and rheumatic heart disease care. The rationale for the ESP  
6  
7 199 project is that involving diverse stakeholders in a phased approach using aggregated CQI data should  
8  
9 200 stimulate discussion and information sharing, and enhance ownership of the development of  
10  
11 201 interventions to address system gaps. The collaboratively produced findings are intended as a  
12  
13 202 resource for planning implementation interventions that fit materially, historically and culturally  
14  
15 203 with organisational and local contexts.[34]  
16  
17  
18

## 19 204 **METHODS AND ANALYSIS**

20  
21  
22  
23 205 Using a case study approach[35, 36] the DE will examine and enhance the methods through which  
24  
25 206 the dissemination of aggregated data and knowledge co-production are enacted in the ESP project.  
26  
27 207 It seeks to effect changes and develop understanding as the dissemination project and concurrent  
28  
29 208 evaluation proceed through iterative phases of implementation.  
30  
31

### 32 209 **Systematically applying developmental evaluation within the ESP project**

33  
34  
35 210 The DE is designed to align with the aim and design of the ESP project, which will provide  
36  
37 211 opportunities to collect feedback from survey respondents, to identify interview participants and to  
38  
39 212 engage the research team in DE processes.  
40  
41

42 213 Figure 2 illustrates how DE is systematically applied within the ESP project.  
43  
44

45 214 ***[INSERT FIGURE 2]***  
46  
47

48 215 DE processes: The evaluator (AL) is embedded within the research team to support the reflective  
49  
50 216 and iterative nature and the co-creation principle of DE,[21] and to facilitate real-time responses to  
51  
52 217 project conditions and issues as they emerge. The team will discuss and interpret stakeholder  
53  
54 218 feedback, and use reflective critical thinking to identify and clarify issues relevant to implementing  
55  
56 219 the ESP project. Through these processes, decision making for ongoing project implementation will  
57  
58  
59  
60

1  
2  
3 220 be shared amongst team members and informed by data. Insights will be developed about  
4  
5 221 stakeholder and team needs and capacity to engage in the collaborative processes of the ESP  
6  
7 222 project.  
8  
9

10 223 Iterative cycles: These processes will be applied to iterative cycles of reflection through which  
11  
12 224 actions will be agreed, refinements tested, results observed and feedback gathered. The systematic  
13  
14 225 approach will assist in managing the high volume of data and maintaining focus. It will lead to  
15  
16 226 increased understanding of what works well or poorly to illicit findings and engage project  
17  
18 227 participants and the research team in collaborative processes. Project design, processes, tools and  
19  
20 228 reports are expected to be continuously modified to support the presentation of data to inform  
21  
22 229 wide-scale improvement. Team knowledge and skills in relation to implementing interactive  
23  
24 230 dissemination in the context of Indigenous healthcare will be strengthened through the continuous  
25  
26 231 cycle of learning and development, as phases of the dissemination project are repeated using sets of  
27  
28 232 aggregated CQI data in different areas of clinical care.  
29  
30  
31

32 233 Implementation context: The DE study is being conducted within the wider context for CQI research  
33  
34 234 in Australian Indigenous PHC, where CQI is used within many health centres. There is a positive  
35  
36 235 policy environment for CQI and a history of researcher-service provider partnerships for CQI  
37  
38 236 development.  
39  
40  
41

#### 42 237 **Data collection and analysis methods**

43  
44  
45 238 The sources of data used in this DE study include documentation, quantitative and qualitative  
46  
47 239 surveys and participant interviews. A further source of evidence is participant-observation[36] - the  
48  
49 240 actions taken by the research team following their review of evidence and experiences during  
50  
51 241 project implementation. These are appropriate sources for research in which theory is nascent and  
52  
53 242 research questions are exploratory.[37]  
54  
55

#### 56 243 **1. Document analysis**

57  
58  
59  
60

1  
2  
3 244 Administrative project records will provide information about the context, scope, early stages of ESP  
4  
5 245 project development, report distribution and ongoing implementation. Data sources will include  
6  
7 246 meeting minutes and recorded interactions between research team members, and between team  
8  
9 247 members and other stakeholders. These documents will be used to identify and clarify key issues,  
10  
11 248 dates, events and tasks, and to track key decisions and developments in the ESP design, processes,  
12  
13 249 reports and other resources.

## 16 17 250 **2. Survey data**

18  
19  
20 251 Online surveys designed to collect data leading to the generation of wide-scale CQI strategies (as  
21  
22 252 part of the ESP project) incorporate evaluative questions. The questions will ask respondents to rate,  
23  
24 253 on a Likert scale, the accessibility, content, usefulness and useability of information in the reports,  
25  
26 254 and the extent to which the reports promote workplace discussion about care quality. These data  
27  
28 255 will be analysed using simple descriptive statistics. Respondents will also be invited to provide free  
29  
30 256 text responses suggesting ways in which the team can improve the surveys and reports, and support  
31  
32 257 data interpretation. Free text responses will be integrated and analysed with other qualitative data.  
33  
34 258 (Explicit survey items are at Supplementary files 1 - 4).

35  
36  
37  
38 259 As key change decisions are made, the research team will modify the surveys to seek feedback about  
39  
40 260 the ESP project modifications. For example, additional questions seeking comments about newly  
41  
42 261 developed resources, design innovations or changed report formats will be included.

43  
44  
45 262 Survey data collected as part of the ESP will provide important evaluation data about who is  
46  
47 263 engaging with project processes across Australian jurisdictions. It will enable the team and evaluator  
48  
49 264 to track stakeholder engagement through each phase and cycle for each clinical care area, including  
50  
51 265 the number of responses to each survey, whether responses are from individuals or groups and how  
52  
53 266 this impacts on responses. Respondent information requested in the surveys includes professional  
54  
55 267 role, scope and location (national, Australian jurisdiction), work setting or population group served  
56  
57  
58  
59  
60

1  
2  
3 268 (e.g. urban, rural, remote populations), type of organisation represented (e.g., community controlled  
4  
5 269 health centre, government health service) and group size (as relevant). This information will enable  
6  
7 270 the purposive sampling of interviewees.  
8  
9

### 10 271 **3. *Semi-structured interviews***

11  
12  
13 272 Semi-structured interviews will be conducted to provide detailed information and feedback for the  
14  
15 273 DE. They will be used to explore emergent themes in the survey data and to probe factors and  
16  
17 274 perspectives relating to participant engagement, use of aggregated data and findings, and how to  
18  
19 275 improve the project processes and presentation of information. (The interview guide is  
20  
21  
22 276 Supplementary file 5.)  
23

24  
25 277 A single Australian jurisdiction will be the focus of qualitative interviews, purposively selected  
26  
27 278 because of its history of CQI and CQI research in Indigenous PHC. Participating health centres have  
28  
29 279 contributed a significant proportion of the aggregated CQI data used in the ESP project. Further  
30  
31 280 interviews will also be conducted with participants who have cross jurisdiction (national) roles.  
32  
33 281 Potential interviewees will be identified from respondent information collected through the surveys  
34  
35 282 - contact details are provided voluntarily by respondents. Interview participants will be purposively  
36  
37 283 sampled from project participants to represent different professional roles, organisation types and  
38  
39 284 work settings, and participation in different ESP project cycles.  
40  
41

42  
43 285 Twenty-five to 30 interviews are expected to provide representative data for effective comparison  
44  
45 286 between groups and settings. The aim will be to conduct sufficient interviews to build a convincing  
46  
47 287 analytical narrative based on richness and detail and to achieve 'information power' in identifying  
48  
49 288 themes in the data.[38] The evaluator (AL) will conduct all interviews.  
50

51  
52 289 Interview transcripts will be de-identified and entered into NVivo, a computer assisted qualitative  
53  
54 290 data analysis program to assist with coding for analysis. The evaluator will generate a priori codes  
55  
56 291 derived from the literature and based on a widely used conceptual framework for knowledge  
57  
58  
59  
60

1  
2  
3 292 translation[39] and the DE research questions, ahead of identifying emergent codes to discover  
4  
5 293 themes, categories and patterns in the data, to explore the relationships between them and to build  
6  
7 294 theories through an inductive process.[40] Coding will be checked by a research colleague to ensure  
8  
9 295 coding reliability and consistency.

10  
11  
12 296 The aim of the analysis of interview data is to provide information for two purposes. Firstly, the  
13  
14 297 preliminary results will be reported and discussed with research team members to help inform the  
15  
16 298 developmental evaluation process. Together with other information, such as survey findings, the  
17  
18 299 interview data will influence real-time changes to ESP project processes, tools and reports as the  
19  
20 300 interactive dissemination project is implemented.

21  
22  
23  
24 301 The second purpose is for interpretation and reflection to gain deep insight and develop  
25  
26 302 understanding relevant to the DE research questions. This includes understanding of the factors  
27  
28 303 influencing stakeholder engagement in the interactive dissemination project, ways to support  
29  
30 304 participation, and the extent to which being involved influences participants' implementation  
31  
32 305 decisions. It includes insights into use of the CQI data and use of project findings about consensus  
33  
34 306 priority evidence-practice gaps, barriers, enablers and strategies for improving care quality.

#### 35 36 37 38 307 **4. Reflective processes with the research team**

39  
40  
41 308 As illustrated in Figure 2, the research team's learning and actions will be guided by a facilitated  
42  
43 309 process of reflection and analysis, drawing on stakeholder feedback and the team's experiences.  
44  
45 310 This processes will enable the team to identify emerging issues and to innovate, test and refine the  
46  
47 311 elements of the interactive dissemination project. It will be based on the questions: What? (What  
48  
49 312 happened?) So what? (What do the results mean or imply? How did we influence the results?)  
50  
51 313 Now what? (How do we respond? What should we do differently?).[41] An example of how these  
52  
53 314 questions are applied is shown in Table 1.

54  
55  
56  
57 315 **[INSERT TABLE 1]**  
58  
59  
60

316 Table 1: Reflective evaluation questions

| <b>What</b><br>(What happened?)                                                                                                                                                                                                                                                                                                                                                                                                                                                                                                                                            | <b>So what?</b><br>(What does it mean?)                                                                                                                                                                                                                                                                                                                                                                                                                                                                                                                                                                                                                                                                                                       | <b>Now what?</b><br>(What to do differently?)                                                                                                                                                                                                                                                                                                                                                                                                                                                                                                                                                                                                                            |
|----------------------------------------------------------------------------------------------------------------------------------------------------------------------------------------------------------------------------------------------------------------------------------------------------------------------------------------------------------------------------------------------------------------------------------------------------------------------------------------------------------------------------------------------------------------------------|-----------------------------------------------------------------------------------------------------------------------------------------------------------------------------------------------------------------------------------------------------------------------------------------------------------------------------------------------------------------------------------------------------------------------------------------------------------------------------------------------------------------------------------------------------------------------------------------------------------------------------------------------------------------------------------------------------------------------------------------------|--------------------------------------------------------------------------------------------------------------------------------------------------------------------------------------------------------------------------------------------------------------------------------------------------------------------------------------------------------------------------------------------------------------------------------------------------------------------------------------------------------------------------------------------------------------------------------------------------------------------------------------------------------------------------|
| <p>How many survey responses did we receive?</p> <p>Whose responses did we capture?</p> <p>What was the quality of data collected through this survey?</p> <p>What feedback did survey respondents and interviewees provide about:</p> <ul style="list-style-type: none"> <li>- the relevance, format and use of the report?</li> <li>- the survey?</li> <li>- supporting resources?</li> </ul> <p>What were team members' experiences of recent implementation processes?</p> <p>What worked well/not so well for you in terms of refinements and modifications made?</p> | <p>Do we need to promote and/or distribute reports in other ways and target particular people?</p> <p>Do we need to clarify, adjust, add or delete survey questions to illicit robust data and encourage engagement?</p> <p>Do we consider modifying the next phase, or the ESP process we use for the next dataset?</p> <p>Do we need to present or explain the data differently to enhance understanding?</p> <p>Do we need to modify report formats and content to make them more accessible to those targeted?</p> <p>Does the literature about presenting research to different user groups match respondent feedback?</p> <p>How does feedback and observation connect with what we know from our experience of engaging healthcare</p> | <p>Based on the explicit and experiential evidence, should we be making further changes to enhance the:</p> <ul style="list-style-type: none"> <li>- quality of data collected</li> <li>- processes</li> <li>- presentation of reports</li> </ul> <p>What is the supporting evidence for a particular direction or modification?</p> <p>How should we prioritise these changes (e.g. considering resources needed, time involved, alignment with theory)?</p> <p>What is the plan of action for making changes?</p> <p>How will these changes impact on the project and others involved (e.g. clinical leaders and report co-authors involved in ESP data analysis)?</p> |

|  |                      |  |
|--|----------------------|--|
|  | stakeholders in CQI? |  |
|--|----------------------|--|

317 CQI - continuous quality improvement; ESP - Engaging Stakeholders in Identifying Priority  
318 Evidence-practice Gaps and Strategies for Improvement in Primary Health Care  
319

320 The processes will thereby reflect CQI processes (plan-do-study-act cycles). Repeating these cycles in  
321 different areas of PHC will offer opportunities to continuously gather data, to learn from each cycle  
322 of stakeholder engagement and feedback and to apply learning to improve the implementation of  
323 subsequent activities within the ESP project (Figure 2). Documenting these processes, team  
324 perceptions and change decisions will enable consideration of the contribution of DE in  
325 strengthening project implementation.

### 326 ***Data integration and analysis***

327 Taking a pragmatic approach, multiple sources of data will be collected, analysed and integrated[42]  
328 to address the objectives of the DE. Each data source will be individually analysed then triangulated  
329 to support validation and cross-checking of findings.[43] Table 2 outlines these processes.

330 In the initial stage of the study, ESP project survey responses will help to inform the development of  
331 the exploratory questions used in the semi-structured interviews for the DE. Thereafter, the  
332 collection of qualitative and quantitative data will occur concurrently. Survey responses will  
333 contribute evaluation data through the ESP project phases and dissemination cycles in each area of  
334 clinical care. Semi-structured interviews will be timed to capture the input of participants engaging  
335 with ESP reports and surveys (e.g., for maternal health, mental health).

336 The continuous data collection, analysis and synthesis processes using different data sources will  
337 provide the team with opportunities to apply what is learned, generate new avenues of enquiry and  
338 ideas, and test changes made within the ESP project.

339 Project documents and records will be used to construct a timeline reflecting key dates, events,  
340 stakeholder feedback and participation, ideas, decisions and implementation of project refinements.



1  
2  
3 341 The timeline will track the project, enabling the team to draw causal hypotheses and informing  
4  
5 342 ongoing change decisions. Bringing together and interpreting the different types of data will help  
6  
7 343 build a comprehensive picture of ESP project development and a contextualised and integrated  
8  
9 344 understanding of the findings and evaluation outcomes of the ESP project.

11  
12 345 Overall, these processes are expected to identify key issues and principles to inform future  
13  
14 346 interactive dissemination efforts and wide-scale CQI in the context of Indigenous PHC, and to  
15  
16 347 contribute knowledge that can be transferred to other healthcare contexts and disciplines.

18  
19  
20 348 **[INSERT TABLE 2]**

21  
22  
23 349 *Table 2: Data sources and their use to address the developmental evaluation objectives*

| DE objective                                                                                                  | Data source                                                                                                                                                                                           | Analysis and use of data to address DE objective                                                                                                                 |
|---------------------------------------------------------------------------------------------------------------|-------------------------------------------------------------------------------------------------------------------------------------------------------------------------------------------------------|------------------------------------------------------------------------------------------------------------------------------------------------------------------|
| Develop and refine the design, reports, processes and resources used in the interactive dissemination project | Document analysis                                                                                                                                                                                     | Identification of implementation strengths, issues and need for refinements                                                                                      |
|                                                                                                               | Survey data                                                                                                                                                                                           | Tracking of actions, issues, decisions, key events, changes<br><br>Analysis of quantitative and qualitative feedback about reports, processes, resources, design |
|                                                                                                               | Semi-structured interviews                                                                                                                                                                            | Identification of emerging data patterns, commonalities and ideas for project improvement                                                                        |
|                                                                                                               | Reflective processes and discussion amongst research team members to integrate, interpret and use different types of data to determine ESP refinement needs and make ongoing implementation decisions |                                                                                                                                                                  |
| Explore the barriers and facilitators to stakeholder engagement in the interactive                            | Semi-structured interviews                                                                                                                                                                            | Coding and analysis of data to develop assertions, propositions, generalisations                                                                                 |

|                                                                                                                                             |                                                                                              |                                                                                                                                                                                 |
|---------------------------------------------------------------------------------------------------------------------------------------------|----------------------------------------------------------------------------------------------|---------------------------------------------------------------------------------------------------------------------------------------------------------------------------------|
| dissemination project                                                                                                                       | Qualitative survey data                                                                      | about factors influencing stakeholder engagement. Interpretation to develop understanding                                                                                       |
|                                                                                                                                             | Preliminary findings contribute to team discussions about ESP refinement and implementation. |                                                                                                                                                                                 |
| Identify actual or intended use of the aggregated CQI data and co-produced knowledge by different stakeholders, and factors influencing use | Semi-structured interviews                                                                   | Coding and analysis of data to develop assertions, propositions, generalisations about stakeholder use of aggregated CQI data and ESP findings. Interpretation to gain insights |
| Assess the overall effectiveness of the interactive dissemination processes used in the ESP project                                         | All                                                                                          | Synthesis of all data types and findings to identify key DE findings and outcomes                                                                                               |

350 DE – developmental evaluation; ESP - Engaging Stakeholders in Identifying Priority

351 Evidence-practice Gaps and Strategies for Improvement in Primary Health Care

352

## 353 **ETHICS AND DISSEMINATION**

### 354 **Ethics**

355 The study has been approved by the Human Research Ethics Committee of the Northern Territory

356 Department of Health and Menzies School of Health Research (Project No. 2015-2329), the Central

357 Australian Human Research Ethics Committee (Project No. 15-288), and the Charles Darwin

358 University Human Research Ethics Committee (Project No. H15030) from March 2015 to 31 May

359 2018.

### 360 **Dissemination**

361 Dissemination will be done by submitting articles to peer-reviewed journals, by thesis and other

362 publications such as research briefs. Results will be presented at conferences and other forums

363 including quality improvement research network meetings.

1  
2  
3 364 **DISCUSSION**  
4  
5

6 365 The study seeks to support, develop and evaluate an interactive dissemination project (the ESP)  
7  
8 366 involving stakeholders in Indigenous PHC in the novel use of aggregated CQI data to identify priority  
9  
10 367 evidence-practice gaps, barriers, enablers, and strategies in different areas of clinical care. The  
11  
12 368 characteristics of DE, particularly its capacity to support emergence and adaptation in complex  
13  
14 369 settings, make it suitable for this purpose. The collection and analysis of DE data through iterative  
15  
16 370 cycles of stakeholder feedback and team reflection will provide information and opportunities for  
17  
18 371 the continual refinement of research report presentation, and the adjustment of tools and processes  
19  
20 372 for capturing participant knowledge. The analysis and interpretation of interview data will provide  
21  
22 373 insights about ways to engage stakeholders in wide-scale CQI, and build greater understanding of  
23  
24 374 the implementation context, use of data and ESP project findings, and implications for system  
25  
26 375 improvement.  
27  
28  
29

30  
31 376 Recent knowledge translation literature indicates gaps in knowledge about how different knowledge  
32  
33 377 translation strategies influence outcomes, and about the relationship between their underlying logic  
34  
35 378 or theory and beneficial outcomes.[8, 44] There is also need for detailed reporting and evaluation of  
36  
37 379 such research.[8, 45] This study can help to address these gaps. The DE is being applied within a  
38  
39 380 project that has adapted a theory-based design linking the development of interventions with  
40  
41 381 modifiable barriers, enablers and identified improvement priorities.[23, 28] In addition to studying  
42  
43 382 the application of theory in the ESP project, the DE offers scope to test, identify and document those  
44  
45 383 elements essential to achieving the intended dissemination outcomes.  
46  
47  
48

49 384 The ESP project acknowledges the importance of the sharing of tacit knowledge amongst  
50  
51 385 practitioners for addressing the 'know-do gap'. [46] Consistent with approaches advocated in recent  
52  
53 386 literature,[47, 48] it adopts a strategy that integrates knowledge production, translation and use  
54  
55 387 across disciplines.[49] It is being implemented with modest resources, utilising online methods of  
56  
57 388 report distribution and feedback, and relying on stakeholder 'buy-in' to enhance report distribution  
58  
59  
60

1  
2  
3 389 and facilitate engagement. There is potential for the DE study to provide useful lessons about the  
4  
5 390 strengths and limitations of such an approach. The study will also contribute knowledge about the  
6  
7 391 conditions and factors that influence stakeholder engagement in wide-scale data interpretation and  
8  
9 392 knowledge co-production using CQI data, and the use of this evidence by various PHC stakeholders  
10  
11 393 and in differing contexts.

12  
13  
14 394 Finally, the DE study is supporting and evaluating a novel interactive dissemination project  
15  
16 395 implemented in the Australian Indigenous healthcare context, in which there is an urgent need to  
17  
18 396 ensure that knowledge from research impacts on driving healthcare improvements. The DE will  
19  
20 397 support the co-production and dissemination of knowledge by stakeholders working in this sector,  
21  
22 398 based on recent national-level CQI data from Australia Indigenous PHC centres – knowledge that can  
23  
24 399 be used to implement improvements at practitioner, team, health centre and higher system levels.  
25  
26 400 The lessons learnt about the potential for using aggregated CQI data for this purpose are expected  
27  
28 401 to be applicable to other healthcare contexts. Researchers, clinicians, policy-makers and managers  
29  
30 402 developing evidence-based system and policy interventions should benefit from this research. The  
31  
32 403 study will also help to address the current gap in the scientific literature about applying  
33  
34 404 developmental evaluation.  
35  
36  
37  
38  
39  
40  
41

## 42 **List of Abbreviations**

43  
44  
45 407 ABCD Audit and Best Practice for Chronic Disease

46  
47  
48 408 CQI continuous quality improvement

49  
50  
51 409 DE developmental evaluation

52  
53  
54 410 ESP *Engaging Stakeholders in Identifying Priority Evidence-practice Gaps and Strategies for*  
55  
56 411 *Improvement in Primary Health Care*  
57  
58  
59  
60

1  
2  
3 412 PHC primary health care  
4  
5  
6  
7

8  
9  
10 413

### 11 414 **Figure 1 Legend**

12  
13 415 ABCD - Audit and Best Practice for Chronic Disease

14  
15 416 CQI - continuous quality improvement

16  
17 417 ESP - Engaging Stakeholders in Identifying Priority Evidence-practice Gaps and Strategies for

18  
19 418 Improvement in Primary Health Care

20  
21 419 PHC - primary health care

22  
23  
24  
25  
26  
27 420

### 28 421 **Figure 2 Legend**

29  
30  
31 422 CQI - continuous quality improvement

32  
33 423 DE - developmental evaluation

34  
35 424 ESP - Engaging Stakeholders in Identifying Priority Evidence-practice Gaps and Strategies for

36  
37 425 Improvement in Primary Health Care

38  
39 426 PHC - primary health care

40  
41 427 *Adapted from Togni, Askew et al. 2016*

42  
43  
44  
45 428

### 46 429 **Authors' contributions**

47  
48  
49 430 AL developed the protocol and manuscript drafts. All authors reviewed drafts and contributed to

50  
51 431 manuscript development. RB leads the ESP project and supervised the protocol design and writing

52  
53 432 process. JB and VM contributed to the ESP project design and will provide data for the

54  
55  
56  
57  
58  
59  
60

1  
2  
3 433 developmental evaluation study. FC, GH and NP contributed to the methodology and provided  
4  
5 434 advice during protocol development. All authors read and approved the final manuscript.  
6  
7

## 8 435 **Funding**

9  
10  
11 436 The ABCD National Research Partnership Project has been supported by funding from the National  
12  
13 437 Health and Medical Research Council (545267) and the Lowitja Institute, and by in-kind and financial  
14  
15 438 support from Community Controlled and Government agencies. Alison Laycock is supported by a  
16  
17 439 National Health and Medical Research Council Postgraduate Scholarship (1094595), and by the  
18  
19 440 Centre of Research Excellence: An Innovation Platform for Integrated Quality Improvement in  
20  
21 441 Indigenous Primary Health Care (CRE-IQI, funded by the NHMRC ID 1078927). Ross Bailie's work has  
22  
23 442 been supported by an Australian Research Council Future Fellowship (100100087). The views  
24  
25 443 expressed in this publication are those of the authors and do not necessarily reflect the views of the  
26  
27 444 funding agencies.  
28  
29  
30  
31  
32

## 33 445 **Acknowledgements**

34  
35  
36  
37 446 The development of this manuscript would not have been possible without the active support,  
38  
39 447 enthusiasm and commitment of staff in participating primary health care services, and members of  
40  
41 448 the ABCD National Research Partnership and the Centre for Research Excellence in Integrated  
42  
43 449 Quality Improvement in Indigenous Primary Health Care. The authors thank Samantha Togni for  
44  
45 450 feedback on Figure 2.  
46  
47  
48

## 49 451 **Competing interests**

50  
51  
52  
53 452 The authors declare that they have no competing interests.  
54  
55

## 56 453 **References**

- 1
- 2
- 3 454 1. Australian Health Ministers' Advisory Council. Aboriginal and Torres Strait Islander Health
- 4 455 Performance Framework 2014 Report. Canberra: 2015.
- 5 456 2. Australian Institute of Health and Welfare. Australia's health 2016. Canberra: AIHW, 2016.
- 6 457 3. O'Neill SM, Hempel S, Lim Y-W, *et al.* Identifying continuous quality improvement
- 7 458 publications: what makes an improvement intervention 'CQI'? *BMJ Qual Saf.* 2011;20(12):1011-9.
- 8 459 4. Bailie R, Matthews V, Brands J, *et al.* A systems-based partnership learning model for
- 9 460 strengthening primary healthcare. *Implement Sci.* 2013;8:143.
- 10 461 5. Bailie RS, Si D, O'Donoghue L, *et al.* Indigenous health: effective and sustainable health
- 11 462 services through continuous quality improvement. *Med J Aust.* 2007;186(10):525-7.
- 12 463 6. Ferlie EB, Shortell SM. Improving the Quality of Health Care in the United Kingdom and the
- 13 464 United States: A Framework for Change. *Milbank Q.* 2001;79(2):281.
- 14 465 7. Starfield B, Gervas J, Mangin D. Clinical Care and Health Disparities. *Annu Rev Public Health.*
- 15 466 2012;33(1):89-106.
- 16 467 8. Gagliardi AR, Berta W, Kothari A, *et al.* Integrated knowledge translation (IKT) in health care:
- 17 468 a scoping review. *Implement Sci.* 2016;11(1):38.
- 18 469 9. Anderson I, Robson B, Connolly M, *et al.* Indigenous and tribal peoples' health (The Lancet–
- 19 470 Lowitja Institute Global Collaboration): a population study. *Lancet.* 2016;388(10040):131-57.
- 20 471 10. Baba JT, Brolan CE, Hill PS. Aboriginal medical services cure more than illness: a qualitative
- 21 472 study of how Indigenous services address the health impacts of discrimination in Brisbane
- 22 473 communities. *Int J Equity Health.* 2014;13(1):1-10.
- 23 474 11. Fiscella K, Sanders MR. Racial and Ethnic Disparities in the Quality of Health Care. *Annu Rev*
- 24 475 *Public Health.* 2016;37:375-94.
- 25 476 12. Davy C, Cass A, Brady J, *et al.* Facilitating engagement through strong relationships between
- 26 477 primary healthcare and Aboriginal and Torres Strait Islander peoples. *Aust N Z J Public Health.*
- 27 478 2016:n/a-n/a.
- 28 479 13. Kothari AR, Bickford JJ, Edwards N, *et al.* Uncovering tacit knowledge: a pilot study to
- 29 480 broaden the concept of knowledge in knowledge translation. *BMC Health Serv Res.* 2011;11:198-.
- 30 481 14. Lopez-Class M, Peprah E, Zhang X, *et al.* A Strategic Framework for Utilising Late-Stage (T4)
- 31 482 Translational Research to Address Health Inequities. *Ethn Dis.* 2016;26(3).
- 32 483 15. Rey L, Tremblay M, Brousselle A. Managing Tensions between Evaluation and Research:
- 33 484 Illustrative Cases of Developmental Evaluation in the Context of Research. *Am J Eval.* 2014;35(1):45-
- 34 485 60.
- 35 486 16. Conklin J, Farrell B, Ward N, *et al.* Developmental evaluation as a strategy to enhance the
- 36 487 uptake and use of deprescribing guidelines: protocol for a multiple case study. *Implement Sci.*
- 37 488 2015;10(1):91.
- 38 489 17. Patton MQ. Essentials of Utilization-Focused Evaluation. Thousand Oaks, California: Sage
- 39 490 Publishing; 2012.
- 40 491 18. Gagnon M. Knowledge dissemination and exchange of knowledge Ottawa: Canadian
- 41 492 Institutes of Health Research; 2010. Available from: <http://www.cihr-irsc.gc.ca/e/41953.html>.
- 42 493 19. Hummelbrunner R. Systems thinking and evaluation. *Eval.* 2011;17(4):395-403.
- 43 494 20. Patton MQ. Developmental Evaluation: Applying Complexity Concepts to Enhance
- 44 495 Innovation and Use. New York: The Guilford Press; 2011.
- 45 496 21. Patton MQ, McKegg K, Wehipeihana N. Developmental Evaluation Exemplars: Principles in
- 46 497 Practice. 1st ed. New York: The Guildford Press; 2016.
- 47 498 22. Dozois E, Langlois M, Blanchet-Cohen N. DE 201: A practitioner's guide to developmental
- 48 499 evaluation: The J.W. McConnell Family Foundation and the International Institute for Child Rights
- 49 500 and Development; 2010.
- 50 501 23. Laycock A, Bailie J, Matthews V, *et al.* Interactive dissemination: engaging stakeholders in
- 51 502 the use of aggregated quality improvement data for system-wide change in Australian Indigenous
- 52 503 primary health care. *Front Public Health.* 2016;4.
- 53
- 54
- 55
- 56
- 57
- 58
- 59
- 60

- 1  
2  
3 504 24. Bailie J, Laycock A, Matthews V, *et al.* System-Level Action Required for Wide-Scale  
4 505 Improvement in Quality of Primary Health Care: Synthesis of Feedback from an Interactive Process  
5 506 to Promote Dissemination and Use of Aggregated Quality of Care Data. *Front Public Health*.  
6 507 2016;4:86.  
7 508 25. Bailie R, Si D, Shannon C, *et al.* Study protocol: national research partnership to improve  
8 509 primary health care performance and outcomes for Indigenous peoples. *BMC Health Serv Res*.  
9 510 2010;10:129.  
10 511 26. Grimshaw JM, Eccles MP, Lavis JN, *et al.* Knowledge translation of research findings.  
11 512 *Implement Sci*. 2012;7:50.  
12 513 27. Hailey D, Grimshaw J, Eccles M, *et al.* Effective Dissemination of Findings from Research  
13 514 Edmonton, AB, CA: Institute of Health Economics, 2008.  
14 515 28. French SD, Green SE, O'Connor DA, *et al.* Developing theory-informed behaviour change  
15 516 interventions to implement evidence into practice: a systematic approach using the Theoretical  
16 517 Domains Framework. *Implement Sci*. 2012;7:38-.  
17 518 29. Michie S, Johnston M, Abraham C, *et al.* Making psychological theory useful for  
18 519 implementing evidence based practice: a consensus approach. *Qual Saf Health Care*. 2005;14(1):26-  
19 520 33.  
20 521 30. Huijg JM, Gebhardt WA, Crone MR, *et al.* Discriminant content validity of a theoretical  
21 522 domains framework questionnaire for use in implementation research. *Implement Sci*. 2014;9(11).  
22 523 31. Wagner EH, Austin BT, Davis C, *et al.* Improving chronic illness care: translating evidence into  
23 524 action: interventions that encourage people to acquire self-management skills are essential in  
24 525 chronic illness care. *Health Aff*. 2001;20(6):64-78.  
25 526 32. Schierhout G, Hains J, Si D, *et al.* Evaluating the effectiveness of a multifaceted, multilevel  
26 527 continuous quality improvement program in primary health care: developing a realist theory of  
27 528 change. *Implement Sci*. 2013;8:119.  
28 529 33. Tugwell P, Robinson V, Grimshaw J, *et al.* Systematic reviews and knowledge translation. *Bull*  
29 530 *World Health Organ*. 2006;84(8):643-51.  
30 531 34. Jackson C, Greenhalgh T. Co-creation: a new approach to optimising research impact? *Med J*  
31 532 *Aust*. 2015;203(7):2.  
32 533 35. Thomas G. A Typology for the Case Study in Social Science Following a Review of Definition,  
33 534 Discourse, and Structure. *Qual Inq*. 2011;17(6):511-21.  
34 535 36. Yin R. Case study research: design and methods: Sage Publication; 2009.  
35 536 37. Baker GR. The contribution of case study research to knowledge of how to improve quality  
36 537 of care. *BMJ Qual Saf*. 2011;20:i30-5.  
37 538 38. Malterud K, Siersma VD, Guassora AD. Sample Size in Qualitative Interview Studies: Guided  
38 539 by Information Power. *Qual Health Res*. 2015;1(8).  
39 540 39. Harvey G, Kitson A. Implementing Evidence-based Practice in Healthcare: A Facilitation  
40 541 Guide. London, United Kingdom: Taylor & Francis Ltd; 2015.  
41 542 40. Patton MQ. Qualitative Evaluation and Research Methods. 3rd ed. Thousand Oaks,  
42 543 California, USA: Sage; 2002.  
43 544 41. Rolfe G, Freshwater D, Jasper M. Critical reflection for nursing and the helping professions: a  
44 545 user's guide. Basingstoke: Palgrave Macmillan; 2001.  
45 546 42. Feters MD, Freshwater D. The 1 + 1 = 3 Integration Challenge. *J Mix Methods Res*.  
46 547 2015;9(2):115-7.  
47 548 43. Creswell J, Klassen A, Plano Clark V, *et al.* Best Practices for Mixed Methods Research in the  
48 549 Health Sciences. USA: Office of Behavioral and Social Sciences Research (OBSSR), 2011.  
49 550 44. Davies P, Walker AE, Grimshaw JM. A systematic review of the use of theory in the design of  
50 551 guideline dissemination and implementation strategies and interpretation of the results of rigorous  
51 552 evaluations. *Implement Sci*. 2010;5:14.  
52 553 45. Greenhalgh T, Robert G, Macfarlane F, *et al.* Diffusion of Innovations in Service  
53 554 Organizations: Systematic Review and Recommendations. *Milbank Q*. 2004;82(4):581-629.



- 1  
2  
3 555 46. Greenhalgh T, Wieringa S. Is it time to drop the 'knowledge translation' metaphor? A critical  
4 556 literature review. *J R Soc Med*. 2011;104(12):501-9.  
5 557 47. Bowen SJ, Graham ID. From knowledge translation to engaged scholarship: promoting  
6 558 research relevance and utilization. *Arch Phys Med Rehabil*. 2013;94(1 Suppl):S3-S8.  
7 559 48. Rycroft-Malone J, Christopher R., Bucknal T, *et al*. Collaboration and Co-Production of  
8 560 Knowledge in Healthcare: Opportunities and Challenges. *Int J Health Policy Manag*. 2016;5(4):221-3.  
9 561 49. Kothari A, Wathen CN. A critical second look at integrated knowledge translation. *Health*  
10 562 *Policy*. 2013;109(2):187-91.  
11  
12 563

## 564 **Supplementary Files**

- 15  
16  
17  
18 565 **Supplementary file 1 – Explicit survey items for DE Phase 1 ESP**  
19 566 **Supplementary file 2 – Explicit survey items for DE Phase 2 ESP**  
20 567 **Supplementary file 3 – Explicit survey items for DE Phase 3 ESP**  
21 568 **Supplementary file 4 – Explicit survey items for DE Draft Final ESP Report**  
22 569 **Supplementary file 5 – Interview Guide - ESP DE**  
23  
24 570  
25  
26  
27  
28  
29  
30  
31  
32  
33  
34  
35  
36  
37  
38  
39  
40  
41  
42  
43  
44  
45  
46  
47  
48  
49  
50  
51  
52  
53  
54  
55  
56  
57  
58  
59  
60

1  
2  
3  
4  
5  
6  
7  
8  
9  
10  
11  
12  
13  
14  
15  
16  
17  
18  
19  
20  
21  
22  
23  
24  
25  
26  
27  
28  
29  
30  
31  
32  
33  
34  
35  
36  
37  
38  
39  
40  
41  
42  
43  
44  
45  
46  
47  
48  
49  
50  
51  
52  
53  
54  
55  
56  
57  
58  
59  
60

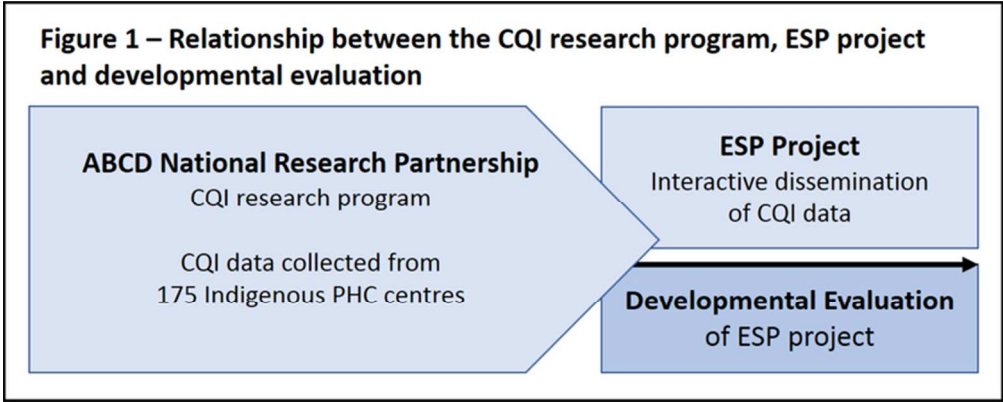

ABCD - Audit and Best Practice for Chronic Disease  
CQI - continuous quality improvement  
ESP - Engaging Stakeholders in Identifying Priority Evidence-practice Gaps and Strategies for Improvement in Primary Health Care  
PHC - primary health care

69x28mm (300 x 300 DPI)

review only

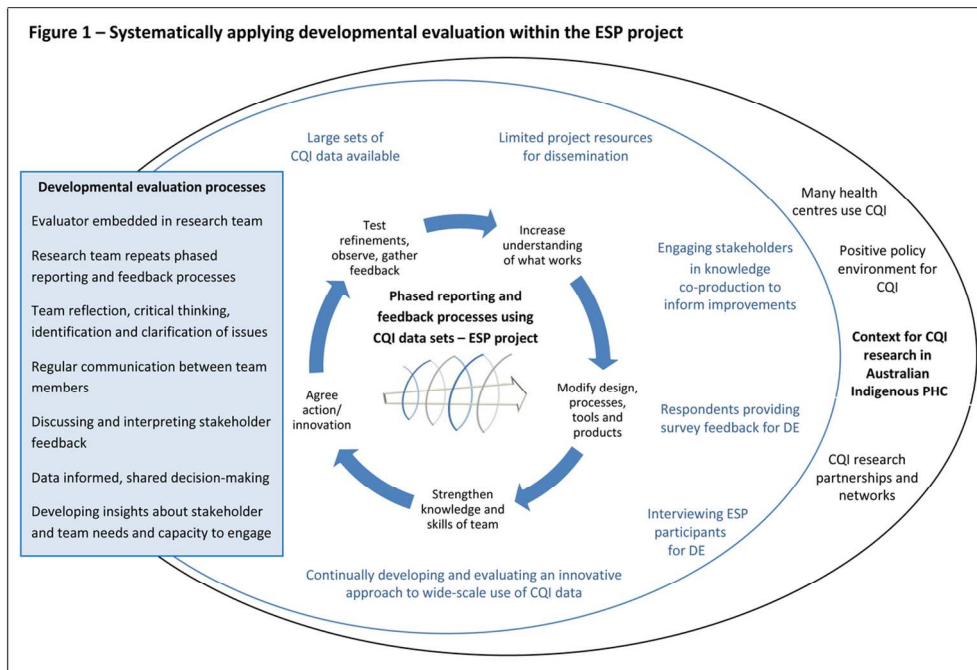

CQI - continuous quality improvement  
DE - developmental evaluation

ESP - Engaging Stakeholders in Identifying Priority Evidence-practice Gaps and Strategies for Improvement in Primary Health Care

PHC - primary health care

Adapted from Togni, Askew et al. 2016

116x77mm (300 x 300 DPI)

## PHASE 1 SURVEY

### *'Engaging Stakeholders in Identifying Priority Evidence-Practice Gaps and Strategies for Improvement in Primary Health Care (ESP)' Project*

#### Specific survey questions relating to presentation of information and project processes

---

#### Example: ESP process for Child Health

---

#### Feedback on how information was presented

Questions relate to three specific parts of the report:

1. The introduction (first 2 pages)
2. The summary of priorities (page 34)
3. The body of the report and presentation of data in tables

#### Introduction of the report (pgs 1-2)

1. How well did this introduction to the report explain:
  - What you would find in the report? [very well, well, not very well, poorly]
  - The purpose of the project (including this survey)? [very well, well, not very well, poorly]
  - Why you might want to take part in the project? [very well, well, not very well, poorly]
  - What you would be required to do? [very well, well, not very well, poorly]
  - Future phases of the project? [very well, well, not very well, poorly]
2. How could the introduction of the report be improved? [Free text response]

#### Summary of priorities from national data (pgs 3-4)

3. How well did this summary of suggested priorities:
  - Present information in a way that was easy to read? [very well, well, not very well, poorly]
  - Present information in a way that was easy to use? [very well, well, not very well, poorly]
  - Capture the implications of the data contained in the body of the report? [very well, well, not very well, poorly]
4. How could the summary of priorities (pgs 3-4) be improved? [Free text response]

#### Body of the report

The body of the report presents data about each indicator of the quality of health care being provided for Aboriginal and Torres Strait Islander children and relevance to best practice guidelines.

5. How well does the body of the report:
  - Present information in a way that is easy to read? [very well, well, not very well, poorly]

- 1  
2  
3 — Present information in a way that is easy to use? [very well, well, not very well, poorly]  
4 — Clearly explain the data about each indicator of the quality of health care provided? [very  
5 well, well, not very well, poorly]  
6 — Clearly explain the implications of these data in terms of best practice guidelines? [very well,  
7 well, not very well, poorly]  
8 — Give you confidence in the accuracy of the information presented? [very well, well, not very  
9 well, poorly]  
10  
11  
12 6. How could the body of the report be improved? [Free text response]  
13  
14  
15 7. Overall, how well does the whole report:  
16 — Present information in a way that is easy for you to read? [very well, well, not very well,  
17 poorly]  
18 — Present information in a way that is easy for you to use? [very well, well, not very well,  
19 poorly]  
20 — Provide information that is useful to you? [very well, well, not very well, poorly]  
21 — Provide information that you would not otherwise have had access to? [very well, well, not  
22 very well, poorly]  
23 — Provide information that is credible? [very well, well, not very well, poorly]  
24 — Encourage discussion about ways of improving child health care (generally)? [very well, well,  
25 not very well, poorly]  
26 — Encourage discussion about improving specific aspects of child health care? [very well, well,  
27 not very well, poorly]  
28 — Encourage action to make improvements in specific aspects of child health care? [very well,  
29 well, not very well, poorly]  
30  
31  
32  
33  
34 8. Any other comments? [Free text response]  
35  
36  
37  
38  
39  
40  
41  
42  
43  
44  
45  
46  
47  
48  
49  
50  
51  
52  
53  
54  
55  
56  
57  
58  
59  
60

## PHASE 2 SURVEY

### *'Engaging Stakeholders in Identifying Priority Evidence-Practice Gaps and Strategies for Improvement in Primary Health Care (ESP)' Project*

Specific survey questions relating to presentation of information and project processes

---

#### Example: ESP process for Child Health

---

We are seeking feedback on how information was presented in the report on 'Trends over Time in Key Indicators of Priority Evidence-Practice Gaps in Child Health'

Your feedback will help us improve future reports.

1. Overall, how well does the report:
  - Present information in a way that is easy for you to read and understand? [very well, well, not very well, poorly]
  - Present information in a way that is easy for you to use? [very well, well, not very well, poorly]
  - Provide information that is useful to you? [very well, well, not very well, poorly]
  - Encourage discussion about the barriers and enablers for addressing the priority evidence-practice gaps for child health? [very well, well, not very well, poorly]
2. Do you have suggestions about how to improve the presentation and usefulness of the refined report, or how it could be changed to encourage discussion? [Free text response]
3. Do you have any comments or suggestions about how to improve future ESP Project surveys? [Free text response]

## PHASE 3 SURVEY

### *'Engaging Stakeholders in Identifying Priority Evidence-Practice Gaps and Strategies for Improvement in Primary Health Care (ESP)' Project*

#### Specific survey questions relating to presentation of information and project processes

---

#### Example: ESP process for Child Health

---

#### Feedback on the report

1. Overall, how well does the report:
  - Present information in a way that is relevant and useful to you? [very well, well, not very well, poorly]
  - Present information in a way that is easy for you to read and understand? [very well, well, not very well, poorly]
  - Present information that is easy to use? [very well, well, not very well, poorly]
  - Provide information that you would not otherwise have had access to? [very well, well, not very well, poorly]
  - Encourage discussion about the barriers, enablers and strategies for closing the priority evidence-practice gaps for child health? [very well, well, not very well, poorly]
2. Any other comments? [Free text response]

#### Feedback on the evidence brief

Overall, how well does the evidence brief:

- Present evidence that is relevant and useful to you? [poorly, not very well, well, very well]
  - Present evidence that is credible? [poorly, not very well, well, very well]
  - Present information in a way that is easy for you to read and understand? [poorly, not very well, well, very well]
  - Present information in a way that is easy for you to use? [poorly, not very well, well, very well]
  - Encourage discussion about barriers, enablers and strategies for closing the priority evidence-practice gaps for child health? [poorly, not very well, well, very well]
3. To what extent does the evidence brief:
    - Provide information that is new to you? [not at all, not much, somewhat, quite a bit, a great deal]
    - Increase your understanding of the evidence about what works in making improvements in the quality of Aboriginal and Torres Strait Islander primary health care? [not at all, not much, somewhat, quite a bit, a great deal]

- 1  
2  
3  
4 — Increase your confidence in taking action to bring about improvements in the quality of  
5 Aboriginal and Torres Strait Islander primary health care? [not at all, not much, somewhat,  
6 quite a bit, a great deal]  
7 — Change how you will approach making improvements in the quality of Aboriginal and Torres  
8 Strait Islander primary health care? [not at all, not much, somewhat, quite a bit, a great  
9 deal, N/A]  
10

11 4. How do you rate the evidence brief in terms of its:

- 12  
13 — Content? [Very poor, poor, okay, good, very good]  
14 — Language? [Very poor, poor, okay, good, very good]  
15 — Presentation? [Very poor, poor, okay, good, very good]  
16  
17

18 5. Do you have suggestions about how to improve the content, language, presentation, and/or  
19 usefulness of the evidence brief, or how it could be changed to encourage discussion? [Free  
20 text response]  
21  
22

23 **Feedback on this survey**

- 24  
25 6. Do you have any comments or suggestions about how to improve future ESP Project surveys?  
26 [Free text response]  
27  
28  
29  
30  
31  
32  
33  
34  
35  
36  
37  
38  
39  
40  
41  
42  
43  
44  
45  
46  
47  
48  
49  
50  
51  
52  
53  
54  
55  
56  
57  
58  
59  
60



## SURVEY – DRAFT FINAL ESP REPORT

### *'Engaging Stakeholders in Identifying Priority Evidence-Practice Gaps and Strategies for Improvement in Primary Health Care (ESP)' Project*

Specific survey questions relating to presentation of information and project processes

---

#### Example: ESP process for Child Health

---

#### Feedback on presentation

1. We are interested in your views on presentation of information and content of this report. How well does the presentation of information and content of the report meet your needs? [very well, well, not very well, poorly]
2. If your response to the above question was 'poorly' or 'not well', please provide suggestions for how the presentation could be improved. [Free Text].

#### Feedback on the ESP Project processes

We have used a phased approach to encourage engagement with data by key stakeholders, and to identify strategies to address priority evidence-practice gaps. Your feedback on the Child Health ESP Project processes will help us refine ESP processes for other areas of care.

3. Has the process of cyclical engagement improved your understanding of the CQI data? Please comment on this. [Free Text]
4. Have you used the information provided through this process? If so, how? [Free Text]
5. To help us improve the ESP process, please provide comment on any stakeholder perceptions that may not have been reflected in the survey responses. [Free Text]
6. Please provide any further comments on this phased approach to engage with and use data to inform decision making. [Free Text]
7. Please provide suggestions for dissemination for the Final Child Health Report. [Free Text]

## Interview Guide - Developmental Evaluation of ESP Project

### 1. Professional background and role

1.1 Would you mind summarising your professional background and qualifications please?

1.2 Can you tell me about your current role?

### 2. Involvement in continuous quality improvement and the ESP project

2.1 Can you please summarise your experience or involvement in using continuous quality improvement?

2.2 How have you been involved with the ESP project to date? (areas of care, ESP phases)

2.3 How did you first become aware of the project?

2.4 What were your reasons for participating?

### 3. ESP project methods and processes

3.1 What do you think about the methods used by the ESP project to involve people in interpreting the data? (e.g. How do you find the project processes? Could the distribution or surveys be improved? If not, what aspects worked well for you? If so, how?)

3.2 Are there factors that helped you to access the reports or participate in the project? Can you tell me how that worked?

3.3 Have there been barriers to participating? If so, what are they?

### 4. Discussing and interpreting the data

4.1 Have you discussed the ESP data or findings with others? Please describe (Facilitated group or informal discussion? Did you use project resources - were they helpful? What would have been helpful? Can you recall outcomes or highlights of the discussion?)

4.2 How important is it to be familiar with wide-scale CQI data about evidence-practice gaps, and to have opportunity for input?

4.3 What would be your advice for us, to encourage people to do these surveys and have input (about priority gaps, barriers and strategies for improvement)?

### 5. How evidence is presented in project reports

5.1 In terms of the evidence presented in the reports, does it match what you know and experience through your work?

5.2 Do you have feedback about the way the reports or data are presented?

5.3 How could we improve the presentation of information, or the structure of the reports, to make them more useful to you?

### 6. Use of data and findings

1  
2  
3 6.1 How useful is the aggregated CQI data in your practice? Can you provide examples of how  
4 you have used it?  
5

6  
7 6.2 Have you used the project findings? If so, how?  
8

9 6.3 Have the reports influenced decisions or intentions? Please describe  
10

## 11 **7. Participation in similar projects or processes**

12  
13 7.1 Have you been involved in other processes or projects that have served a similar purpose to  
14 the ESP? If yes, can you tell me about them? (Have ESP processes and data been more/less  
15 useful - in what way?)  
16

## 17 **8. Impact of the ESP project**

18  
19 8.1 Would you like to comment on any other impact of the ESP project – impact to date or  
20 impact that you anticipate?  
21  
22

## 23 **9. Other comments and suggestions**

24  
25 9.1 Do you have further feedback about the project, or suggestions for the ESP team?  
26  
27  
28  
29  
30  
31  
32  
33  
34  
35  
36  
37  
38  
39  
40  
41  
42  
43  
44  
45  
46  
47  
48  
49  
50  
51  
52  
53  
54  
55  
56  
57  
58  
59  
60
