# Supplementary material for: A developmental evaluation to enhance stakeholder engagement in a wide-scale interactive project disseminating quality improvement data: study protocol for a mixed-methods study
Source: PubMed Central journal article supplement — BMJ Open. 2017 Jul 13;7(7):e016341. doi: 10.1136/bmjopen-2017-016341 (PMC5726089; doi:10.1136/bmjopen-2017-016341), 2017-07-13
Supplement: bmjopen-2017-016341supp001.pdf [file bmjopen-2017-016341supp001.pdf]

## PHASE 1 SURVEY

### *'Engaging Stakeholders in Identifying Priority Evidence-Practice Gaps and Strategies for Improvement in Primary Health Care (ESP)' Project*

Specific survey questions relating to presentation of information and project processes

---

#### Example: ESP process for Child Health

---

#### Feedback on how information was presented

Questions relate to three specific parts of the report:

1. The introduction (first 2 pages)
2. The summary of priorities (page 34)
3. The body of the report and presentation of data in tables

#### Introduction of the report (pgs 1-2)

1. How well did this introduction to the report explain:
  - What you would find in the report? [very well, well, not very well, poorly]
  - The purpose of the project (including this survey)? [very well, well, not very well, poorly]
  - Why you might want to take part in the project? [very well, well, not very well, poorly]
  - What you would be required to do? [very well, well, not very well, poorly]
  - Future phases of the project? [very well, well, not very well, poorly]
2. How could the introduction of the report be improved? [Free text response]

#### Summary of priorities from national data (pgs 3-4)

3. How well did this summary of suggested priorities:
  - Present information in a way that was easy to read? [very well, well, not very well, poorly]
  - Present information in a way that was easy to use? [very well, well, not very well, poorly]
  - Capture the implications of the data contained in the body of the report? [very well, well, not very well, poorly]
4. How could the summary of priorities (pgs 3-4) be improved? [Free text response]

#### Body of the report

The body of the report presents data about each indicator of the quality of health care being provided for Aboriginal and Torres Strait Islander children and relevance to best practice guidelines.

5. How well does the body of the report:
  - Present information in a way that is easy to read? [very well, well, not very well, poorly]

- Present information in a way that is easy to use? [very well, well, not very well, poorly]
  - Clearly explain the data about each indicator of the quality of health care provided? [very well, well, not very well, poorly]
  - Clearly explain the implications of these data in terms of best practice guidelines? [very well, well, not very well, poorly]
  - Give you confidence in the accuracy of the information presented? [very well, well, not very well, poorly]
6. How could the body of the report be improved? [Free text response]
7. Overall, how well does the whole report:
- Present information in a way that is easy for you to read? [very well, well, not very well, poorly]
  - Present information in a way that is easy for you to use? [very well, well, not very well, poorly]
  - Provide information that is useful to you? [very well, well, not very well, poorly]
  - Provide information that you would not otherwise have had access to? [very well, well, not very well, poorly]
  - Provide information that is credible? [very well, well, not very well, poorly]
  - Encourage discussion about ways of improving child health care (generally)? [very well, well, not very well, poorly]
  - Encourage discussion about improving specific aspects of child health care? [very well, well, not very well, poorly]
  - Encourage action to make improvements in specific aspects of child health care? [very well, well, not very well, poorly]
8. Any other comments? [Free text response]
