# Supplementary material for: A developmental evaluation to enhance stakeholder engagement in a wide-scale interactive project disseminating quality improvement data: study protocol for a mixed-methods study
Source: PubMed Central journal article supplement — BMJ Open. 2017 Jul 13;7(7):e016341. doi: 10.1136/bmjopen-2017-016341 (PMC5726089; doi:10.1136/bmjopen-2017-016341), 2017-07-13
Supplement: bmjopen-2017-016341supp002.pdf [file bmjopen-2017-016341supp002.pdf]

## PHASE 2 SURVEY

### *'Engaging Stakeholders in Identifying Priority Evidence-Practice Gaps and Strategies for Improvement in Primary Health Care (ESP)' Project*

Specific survey questions relating to presentation of information and project processes

---

#### Example: ESP process for Child Health

---

We are seeking feedback on how information was presented in the report on 'Trends over Time in Key Indicators of Priority Evidence-Practice Gaps in Child Health'

Your feedback will help us improve future reports.

1. Overall, how well does the report:
  - Present information in a way that is easy for you to read and understand? [very well, well, not very well, poorly]
  - Present information in a way that is easy for you to use? [very well, well, not very well, poorly]
  - Provide information that is useful to you? [very well, well, not very well, poorly]
  - Encourage discussion about the barriers and enablers for addressing the priority evidence-practice gaps for child health? [very well, well, not very well, poorly]
2. Do you have suggestions about how to improve the presentation and usefulness of the refined report, or how it could be changed to encourage discussion? [Free text response]
3. Do you have any comments or suggestions about how to improve future ESP Project surveys? [Free text response]
