# Supplementary material for: A developmental evaluation to enhance stakeholder engagement in a wide-scale interactive project disseminating quality improvement data: study protocol for a mixed-methods study
Source: PubMed Central journal article supplement — BMJ Open. 2017 Jul 13;7(7):e016341. doi: 10.1136/bmjopen-2017-016341 (PMC5726089; doi:10.1136/bmjopen-2017-016341), 2017-07-13
Supplement: bmjopen-2017-016341supp003.pdf [file bmjopen-2017-016341supp003.pdf]

## PHASE 3 SURVEY

### *'Engaging Stakeholders in Identifying Priority Evidence-Practice Gaps and Strategies for Improvement in Primary Health Care (ESP)' Project*

Specific survey questions relating to presentation of information and project processes

---

#### Example: ESP process for Child Health

---

#### Feedback on the report

1. Overall, how well does the report:
  - Present information in a way that is relevant and useful to you? [very well, well, not very well, poorly]
  - Present information in a way that is easy for you to read and understand? [very well, well, not very well, poorly]
  - Present information that is easy to use? [very well, well, not very well, poorly]
  - Provide information that you would not otherwise have had access to? [very well, well, not very well, poorly]
  - Encourage discussion about the barriers, enablers and strategies for closing the priority evidence-practice gaps for child health? [very well, well, not very well, poorly]
2. Any other comments? [Free text response]

#### Feedback on the evidence brief

Overall, how well does the evidence brief:

- Present evidence that is relevant and useful to you? [poorly, not very well, well, very well]
  - Present evidence that is credible? [poorly, not very well, well, very well]
  - Present information in a way that is easy for you to read and understand? [poorly, not very well, well, very well]
  - Present information in a way that is easy for you to use? [poorly, not very well, well, very well]
  - Encourage discussion about barriers, enablers and strategies for closing the priority evidence-practice gaps for child health? [poorly, not very well, well, very well]
3. To what extent does the evidence brief:
    - Provide information that is new to you? [not at all, not much, somewhat, quite a bit, a great deal]
    - Increase your understanding of the evidence about what works in making improvements in the quality of Aboriginal and Torres Strait Islander primary health care? [not at all, not much, somewhat, quite a bit, a great deal]

- Increase your confidence in taking action to bring about improvements in the quality of Aboriginal and Torres Strait Islander primary health care? [not at all, not much, somewhat, quite a bit, a great deal]
- Change how you will approach making improvements in the quality of Aboriginal and Torres Strait Islander primary health care? [not at all, not much, somewhat, quite a bit, a great deal, N/A]

4. How do you rate the evidence brief in terms of its:

- Content? [Very poor, poor, okay, good, very good]
- Language? [Very poor, poor, okay, good, very good]
- Presentation? [Very poor, poor, okay, good, very good]

5. Do you have suggestions about how to improve the content, language, presentation, and/or usefulness of the evidence brief, or how it could be changed to encourage discussion? [Free text response]

#### **Feedback on this survey**

6. Do you have any comments or suggestions about how to improve future ESP Project surveys? [Free text response]
