# Supplementary material for: A developmental evaluation to enhance stakeholder engagement in a wide-scale interactive project disseminating quality improvement data: study protocol for a mixed-methods study
Source: PubMed Central journal article supplement — BMJ Open. 2017 Jul 13;7(7):e016341. doi: 10.1136/bmjopen-2017-016341 (PMC5726089; doi:10.1136/bmjopen-2017-016341), 2017-07-13
Supplement: bmjopen-2017-016341supp004.pdf [file bmjopen-2017-016341supp004.pdf]

## **SURVEY – DRAFT FINAL ESP REPORT**

### ***‘Engaging Stakeholders in Identifying Priority Evidence-Practice Gaps and Strategies for Improvement in Primary Health Care (ESP)’ Project***

**Specific survey questions relating to presentation of information and project processes**

---

#### **Example: ESP process for Child Health**

---

##### **Feedback on presentation**

1. We are interested in your views on presentation of information and content of this report. How well does the presentation of information and content of the report meet your needs? [very well, well, not very well, poorly]
2. If your response to the above question was ‘poorly’ or ‘not very well’, please provide suggestions for how the presentation could be improved. [Free Text].

##### **Feedback on the ESP Project processes**

We have used a phased approach to encourage engagement with data by key stakeholders, and to identify strategies to address priority evidence-practice gaps. Your feedback on the Child Health ESP Project processes will help us refine ESP processes for other areas of care.

3. Has the process of cyclical engagement improved your understanding of the CQI data? Please comment on this. [Free Text]
4. Have you used the information provided through this process? If so, how? [Free Text]
5. To help us improve the ESP process, please provide comment on any stakeholder perceptions that may not have been reflected in the survey responses. [Free Text]
6. Please provide any further comments on this phased approach to engage with and use data to inform decision making. [Free Text]
7. Please provide suggestions for dissemination for the Final Child Health Report. [Free Text]
