# Supplementary material for: A developmental evaluation to enhance stakeholder engagement in a wide-scale interactive project disseminating quality improvement data: study protocol for a mixed-methods study
Source: PubMed Central journal article supplement — BMJ Open. 2017 Jul 13;7(7):e016341. doi: 10.1136/bmjopen-2017-016341 (PMC5726089; doi:10.1136/bmjopen-2017-016341), 2017-07-13
Supplement: bmjopen-2017-016341supp005.pdf [file bmjopen-2017-016341supp005.pdf]

## **Interview Guide - Developmental Evaluation of ESP Project**

### **1. Professional background and role**

- 1.1 Would you mind summarising your professional background and qualifications please?
- 1.2 Can you tell me about your current role?

### **2. Involvement in continuous quality improvement and the ESP project**

- 2.1 Can you please summarise your experience or involvement in using continuous quality improvement?
- 2.2 How have you been involved with the ESP project to date? (areas of care, ESP phases)
- 2.3 How did you first become aware of the project?
- 2.4 What were your reasons for participating?

### **3. ESP project methods and processes**

- 3.1 What do you think about the methods used by the ESP project to involve people in interpreting the data? (e.g. How do you find the project processes? Could the distribution or surveys be improved? If not, what aspects worked well for you? If so, how?)
- 3.2 Are there factors that helped you to access the reports or participate in the project? Can you tell me how that worked?
- 3.3 Have there been barriers to participating? If so, what are they?

### **4. Discussing and interpreting the data**

- 4.1 Have you discussed the ESP data or findings with others? Please describe (Facilitated group or informal discussion? Did you use project resources - were they helpful? What would have been helpful? Can you recall outcomes or highlights of the discussion?)
- 4.2 How important is it to be familiar with wide-scale CQI data about evidence-practice gaps, and to have opportunity for input?
- 4.3 What would be your advice for us, to encourage people to do these surveys and have input (about priority gaps, barriers and strategies for improvement)?

### **5. How evidence is presented in project reports**

- 5.1 In terms of the evidence presented in the reports, does it match what you know and experience through your work?
- 5.2 Do you have feedback about the way the reports or data are presented?
- 5.3 How could we improve the presentation of information, or the structure of the reports, to make them more useful to you?

### **6. Use of data and findings**

6.1 How useful is the aggregated CQI data in your practice? Can you provide examples of how you have used it?

6.2 Have you used the project findings? If so, how?

6.3 Have the reports influenced decisions or intentions? Please describe

**7. Participation in similar projects or processes**

7.1 Have you been involved in other processes or projects that have served a similar purpose to the ESP? If yes, can you tell me about them? (Have ESP processes and data been more/less useful - in what way?)

**8. Impact of the ESP project**

8.1 Would you like to comment on any other impact of the ESP project – impact to date or impact that you anticipate?

**9. Other comments and suggestions**

9.1 Do you have further feedback about the project, or suggestions for the ESP team?
